# Supplementary material for: Photocatalytic Synthesis of 6-Phosphorylated Phenanthridines from 2-Isocyanobiphenyls via Radical C−P and C−C Bond Formation
Source: MDPI journal article supplement (doi:10.3390/catal13071036), 2023-06-25

Photocatalytic Synthesis of 6-Phosphorylated Phenanthridines from  
2-Isocyanobiphenyls via Radical C–P and C–C Bond Formation

Liping Wang,<sup>a</sup> Qin Zhang,<sup>b</sup> Xiaoyan Sang,<sup>a</sup> Qiuping Ding<sup>\*a</sup>

<sup>a</sup> National Engineering Research Center for Carbohydrate Synthesis, Key Lab of Fluorine and Silicon for Energy Materials and Chemistry of Ministry of Education, Key Laboratory for Green Chemistry of Jiangxi Province, Jiangxi Normal University, Nanchang 330022, China; wlp18270823082@126.com (L.W.); sangxiaoyan@jxnu.edu.cn (X.S.)

<sup>b</sup> Basic Geological Survey Institute of Jiangxi Geological Survey Institute, Nanchang 330201, China; 13970090411@163.com

\* Correspondence: dingqiuping@jxnu.edu.cn

## Supporting Information

1. <sup>1</sup>H, <sup>13</sup>C, and <sup>31</sup>P NMR spectra of compounds **3**. (S2-S38)

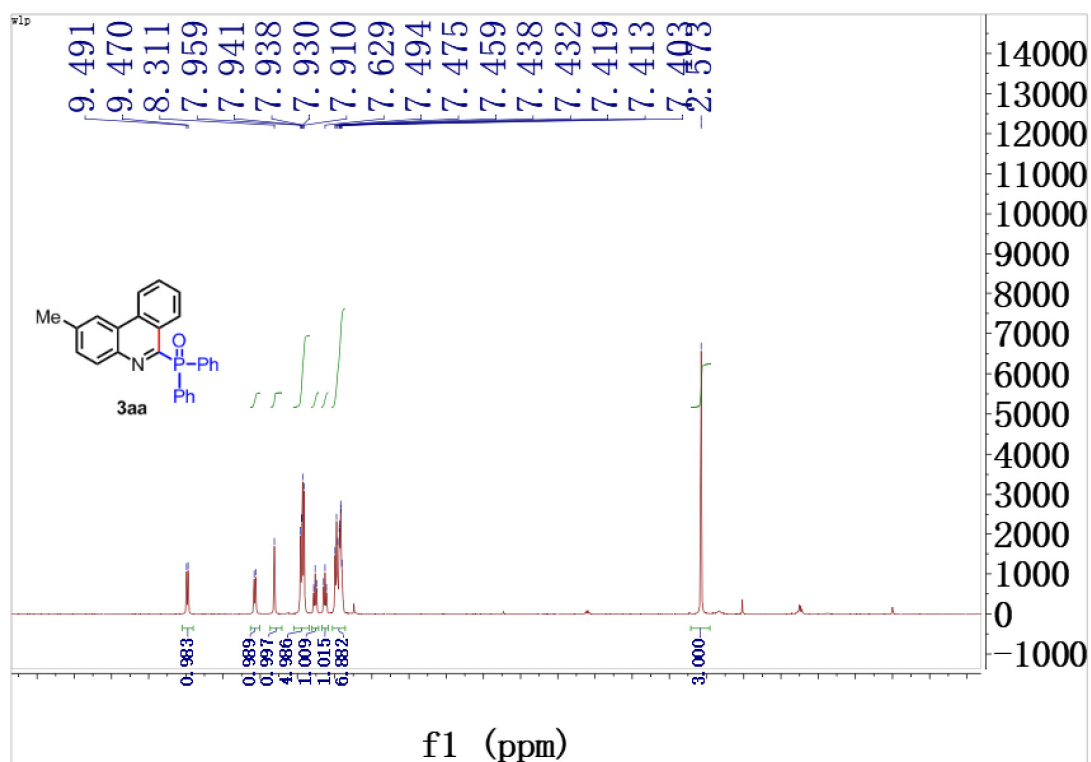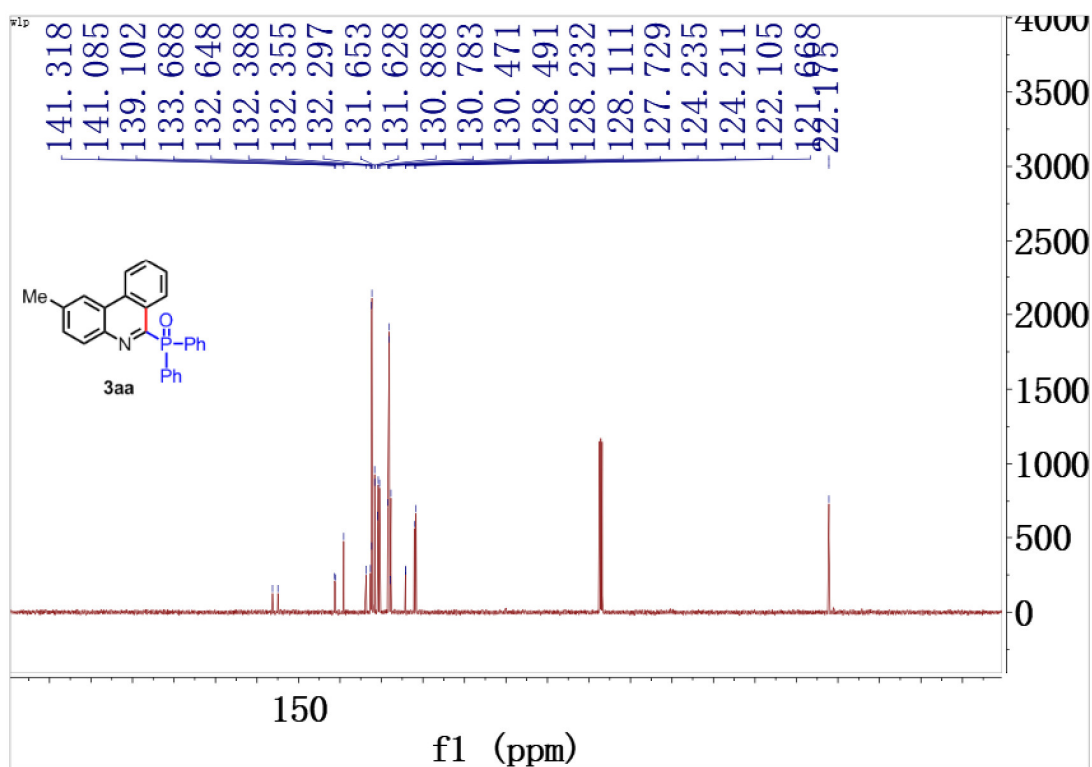

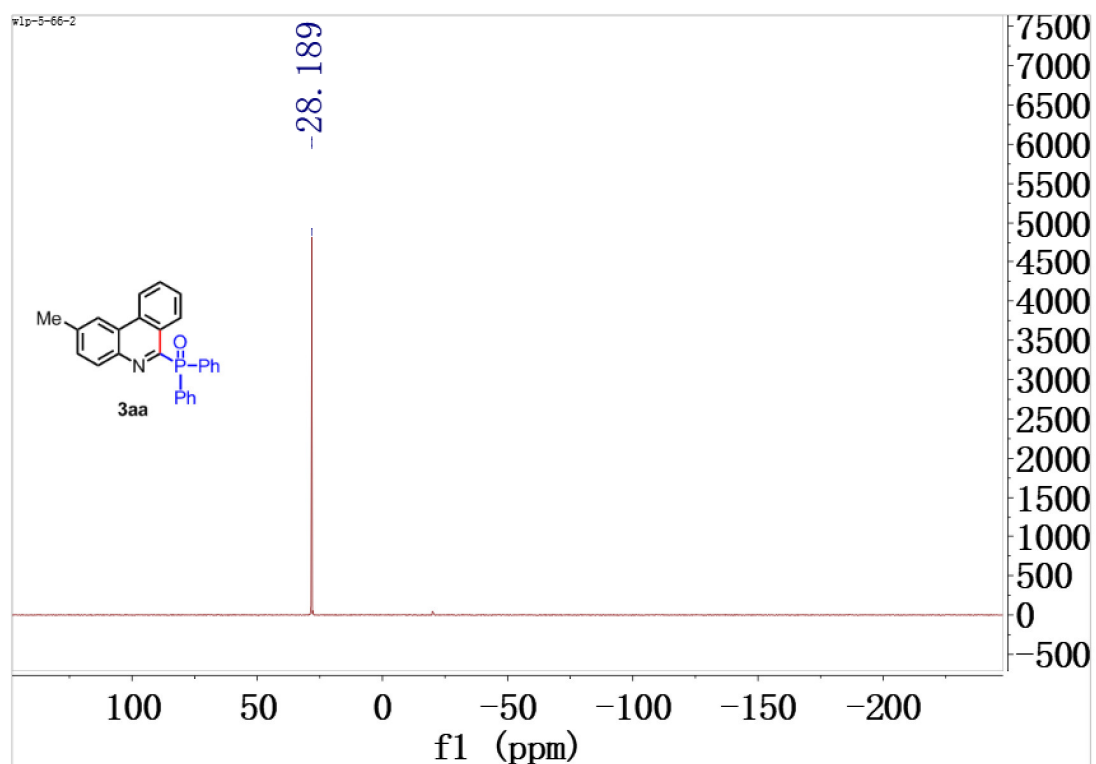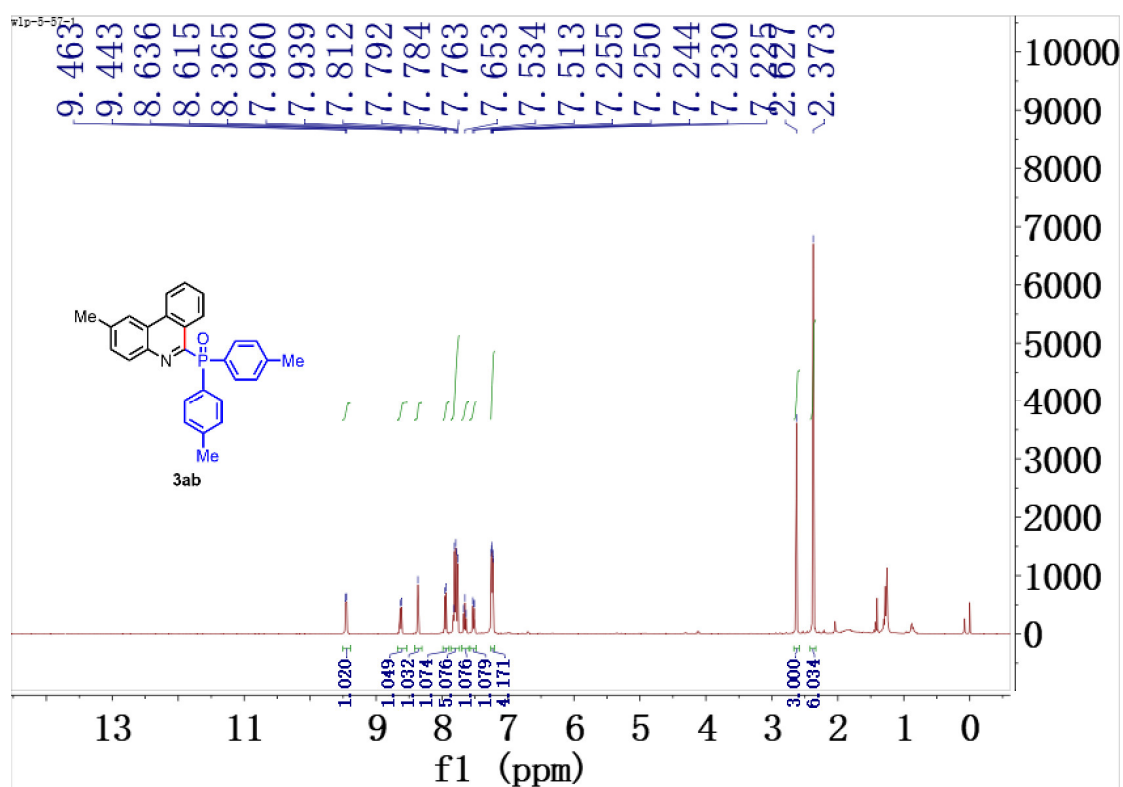

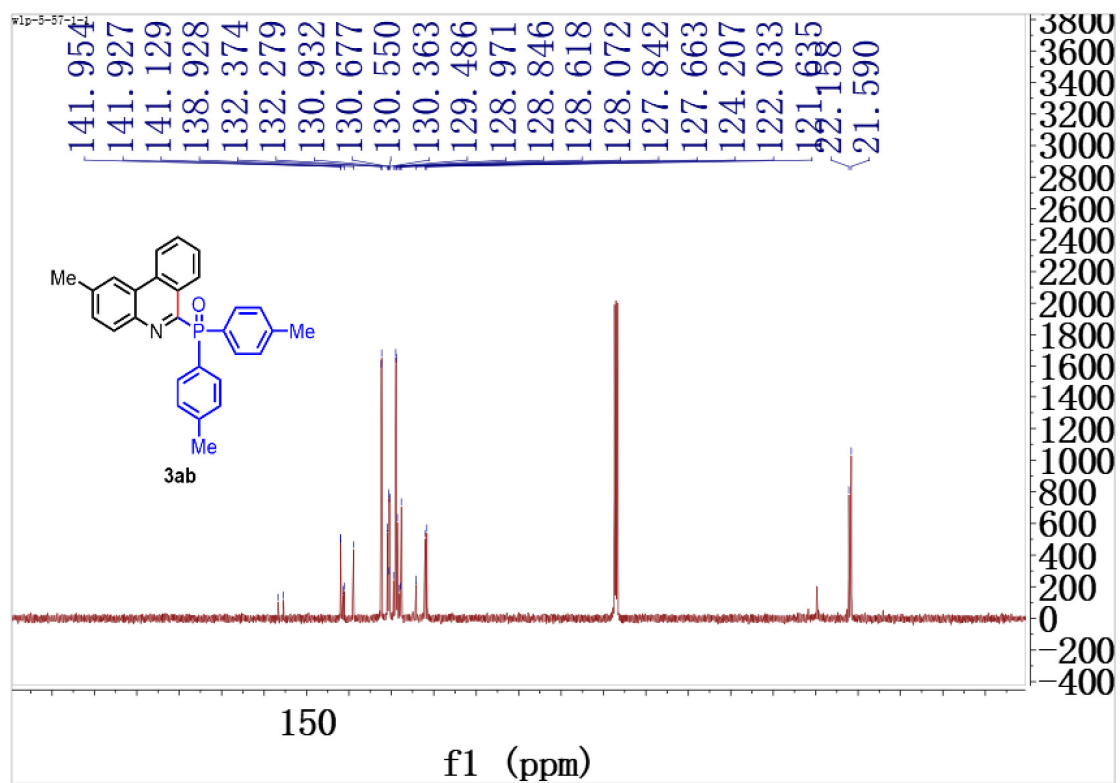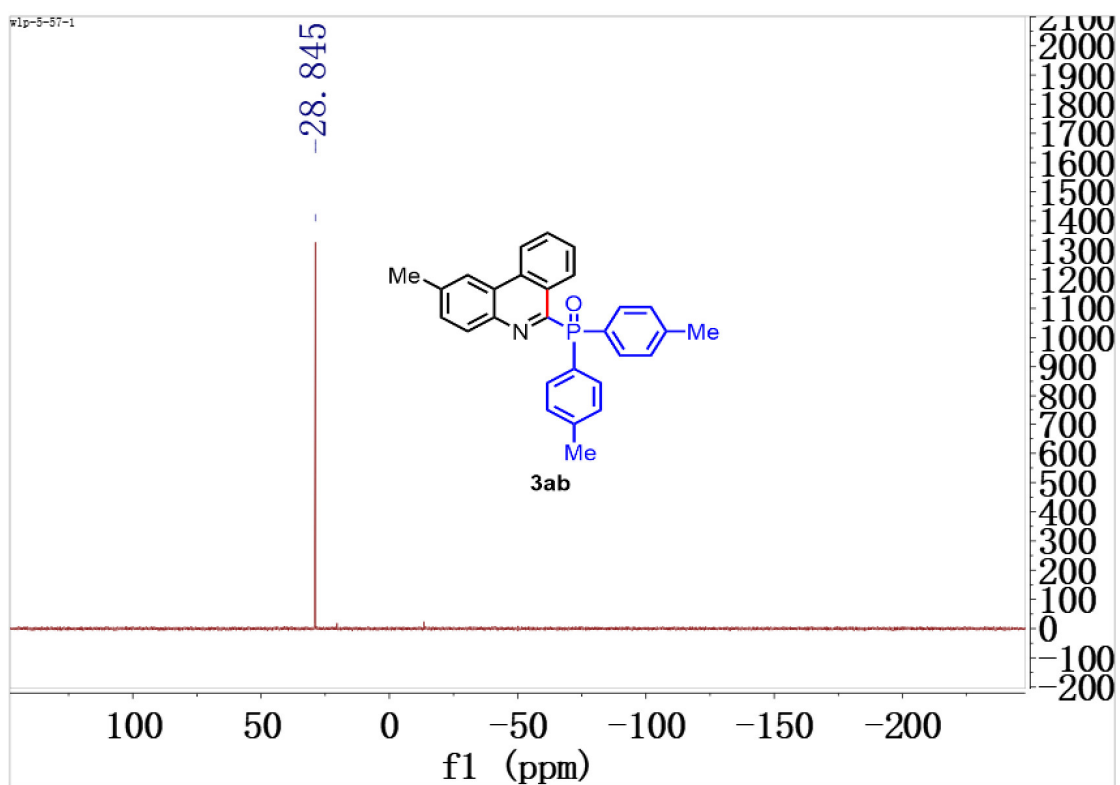



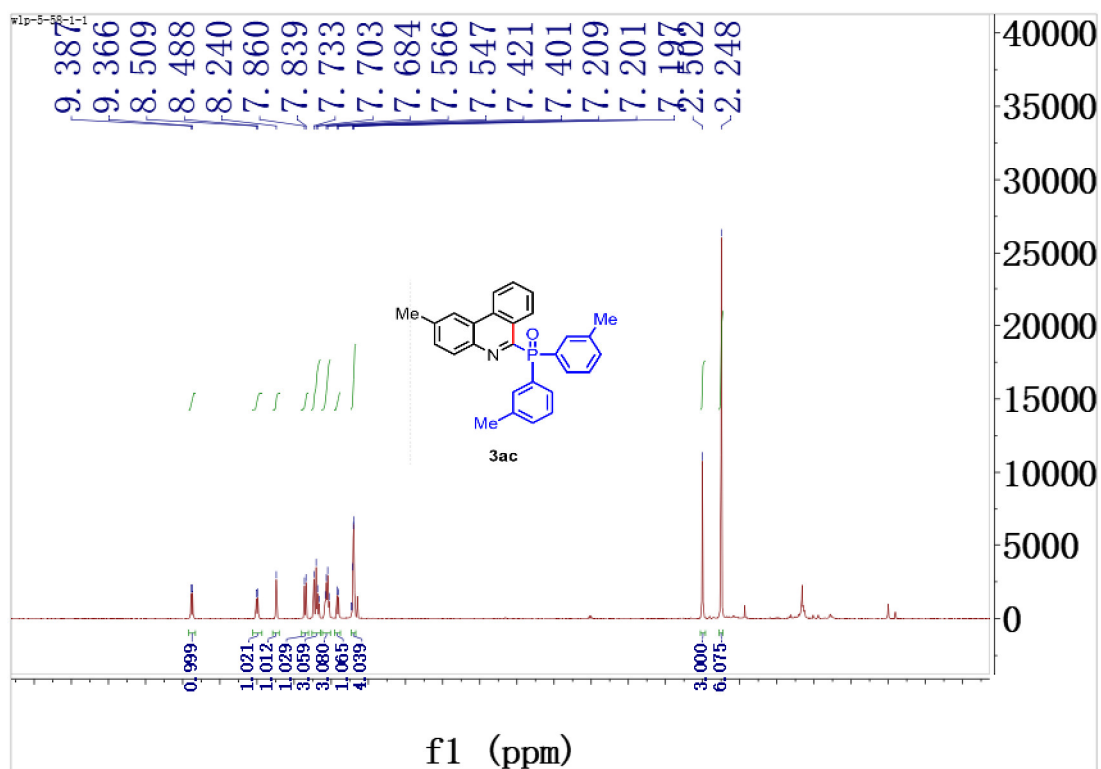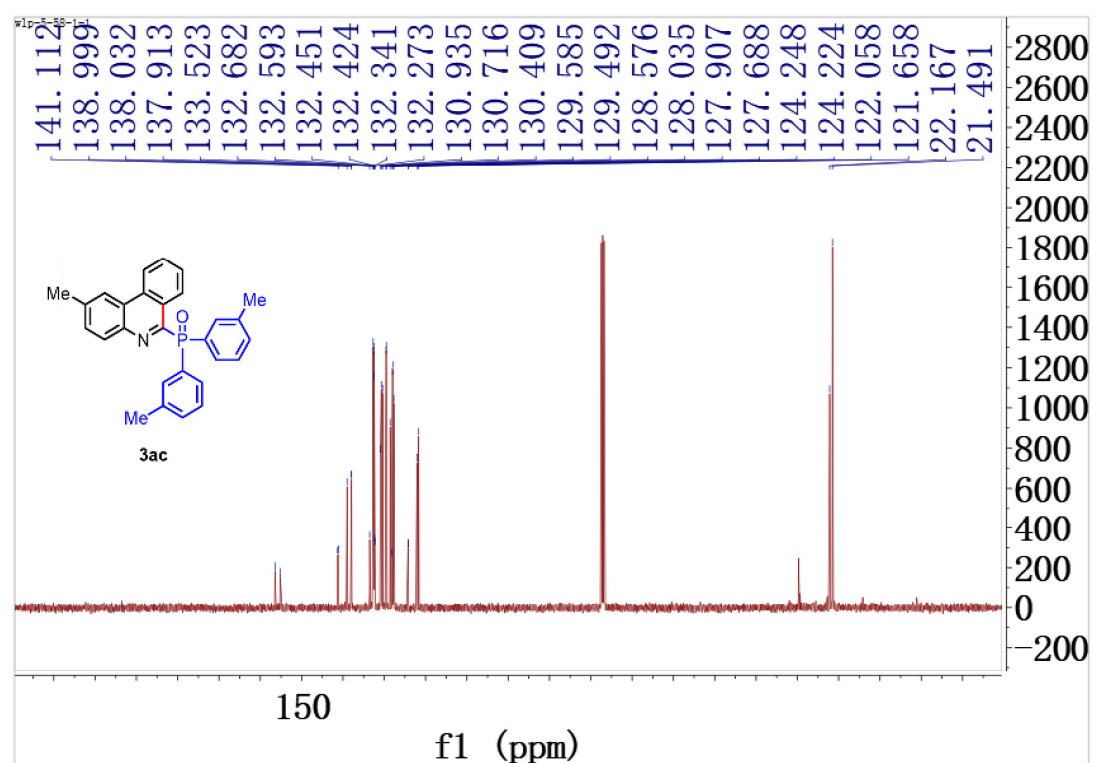

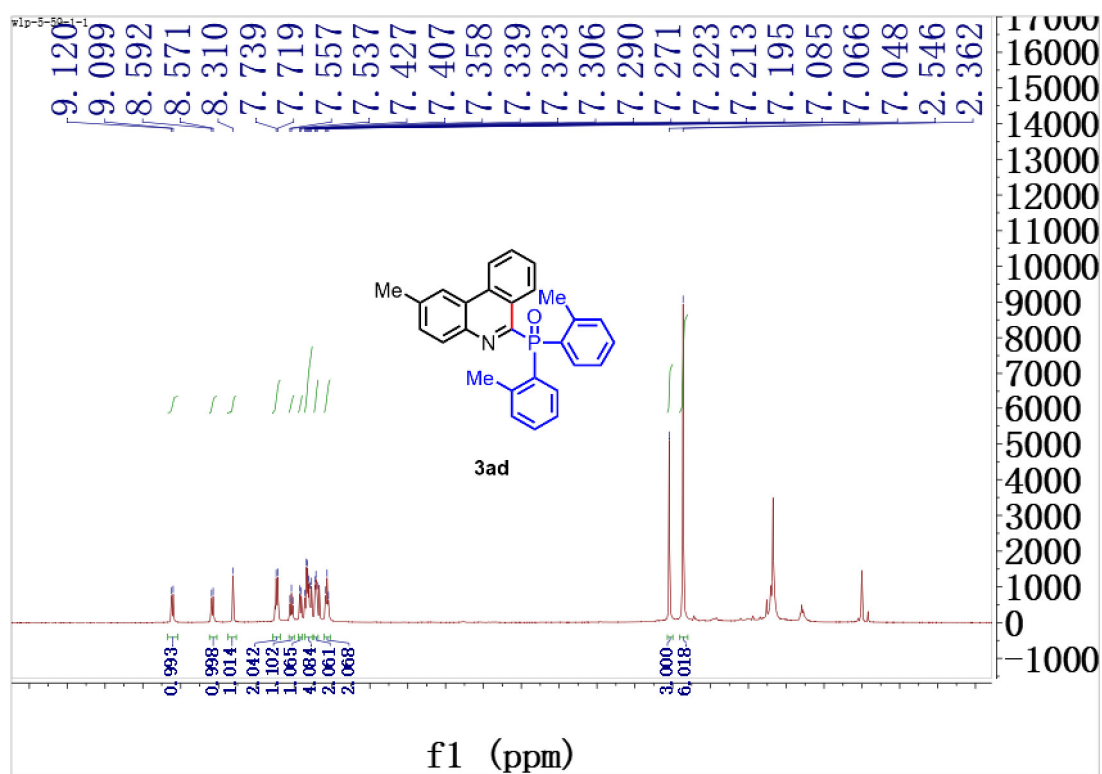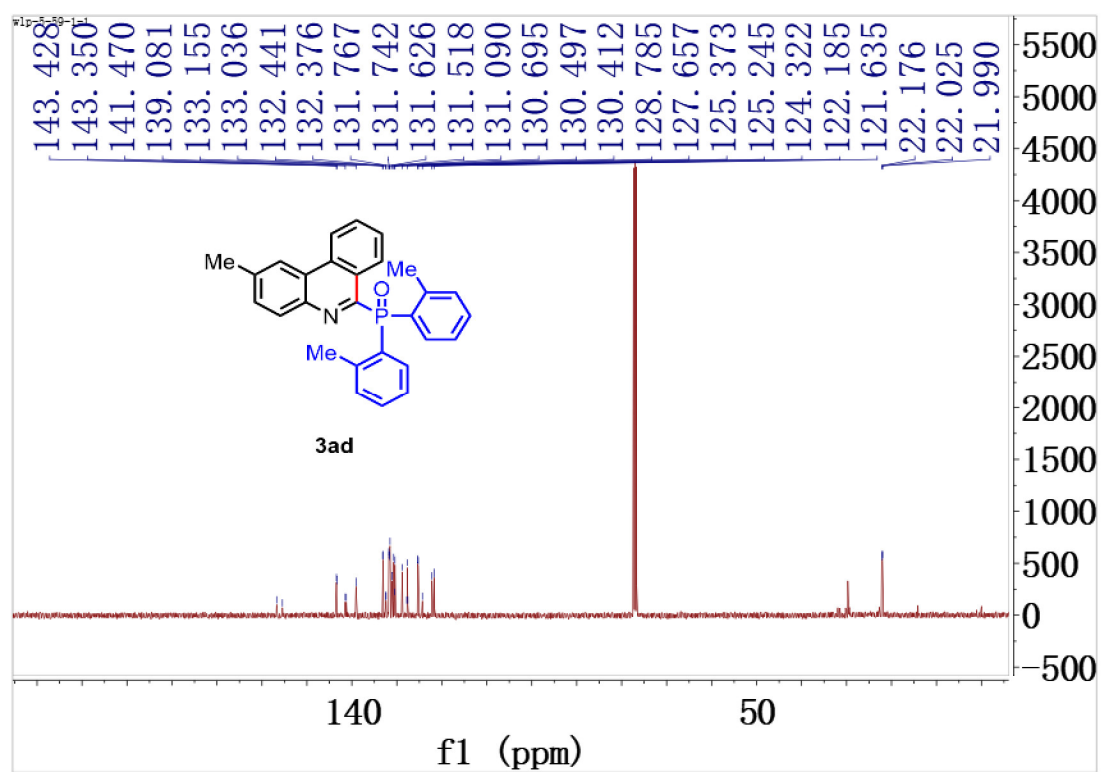

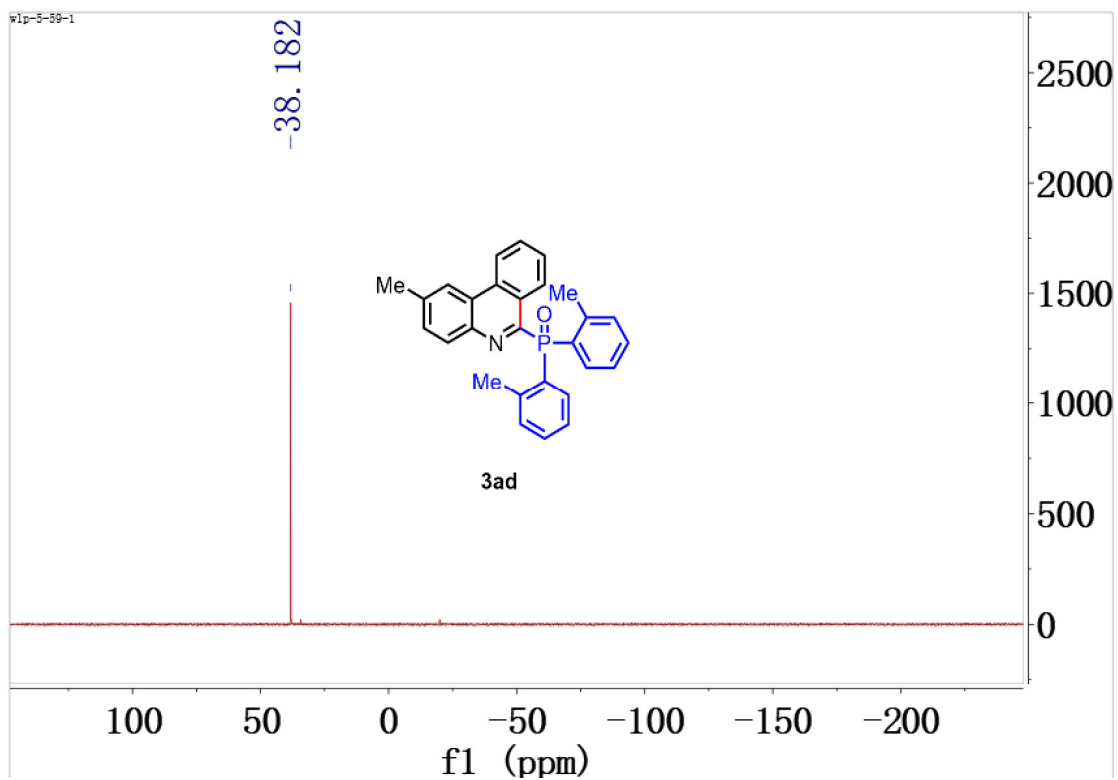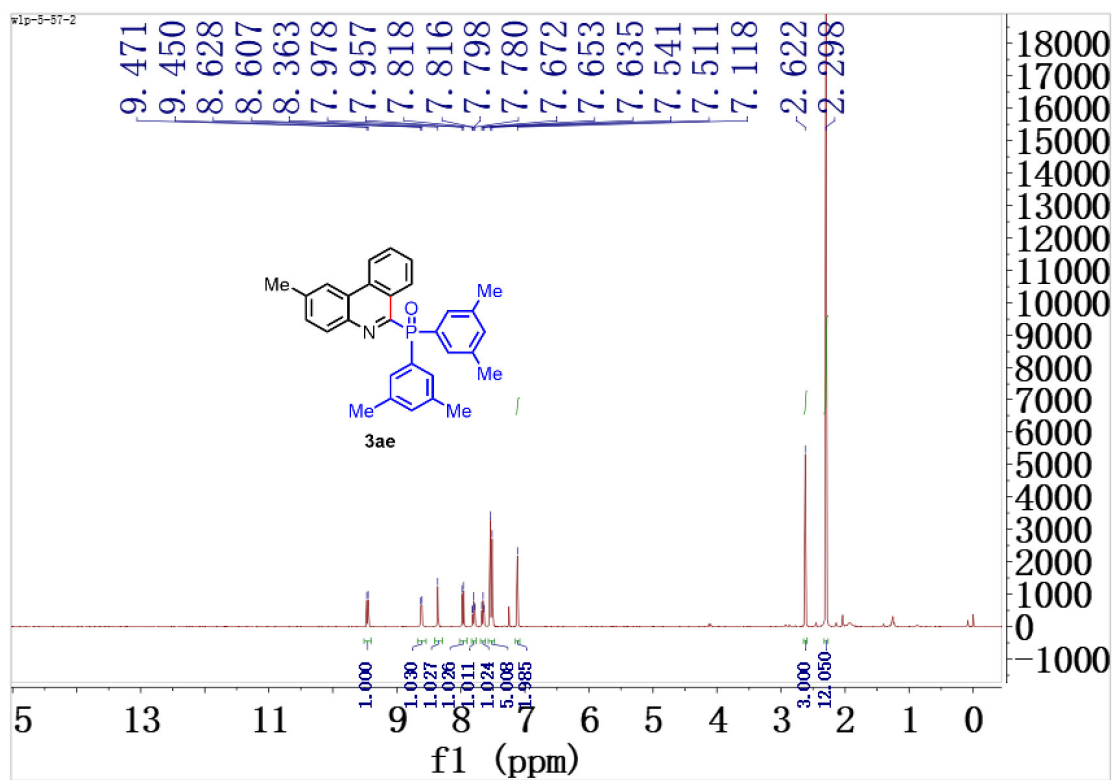

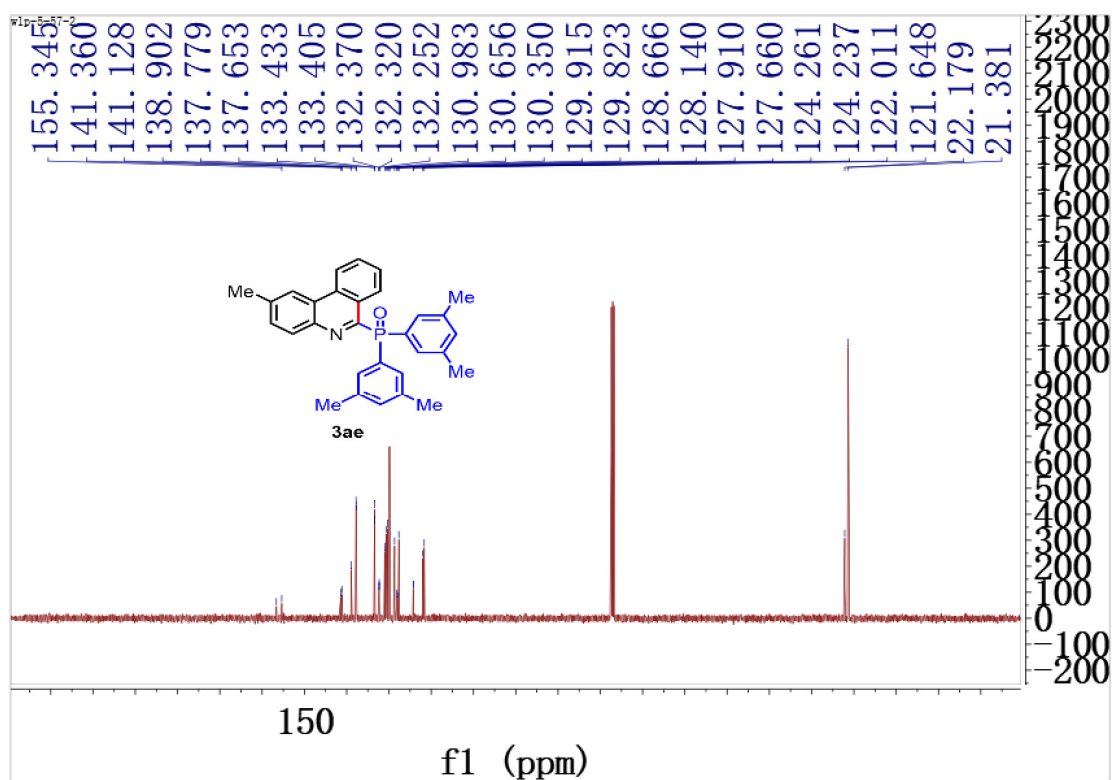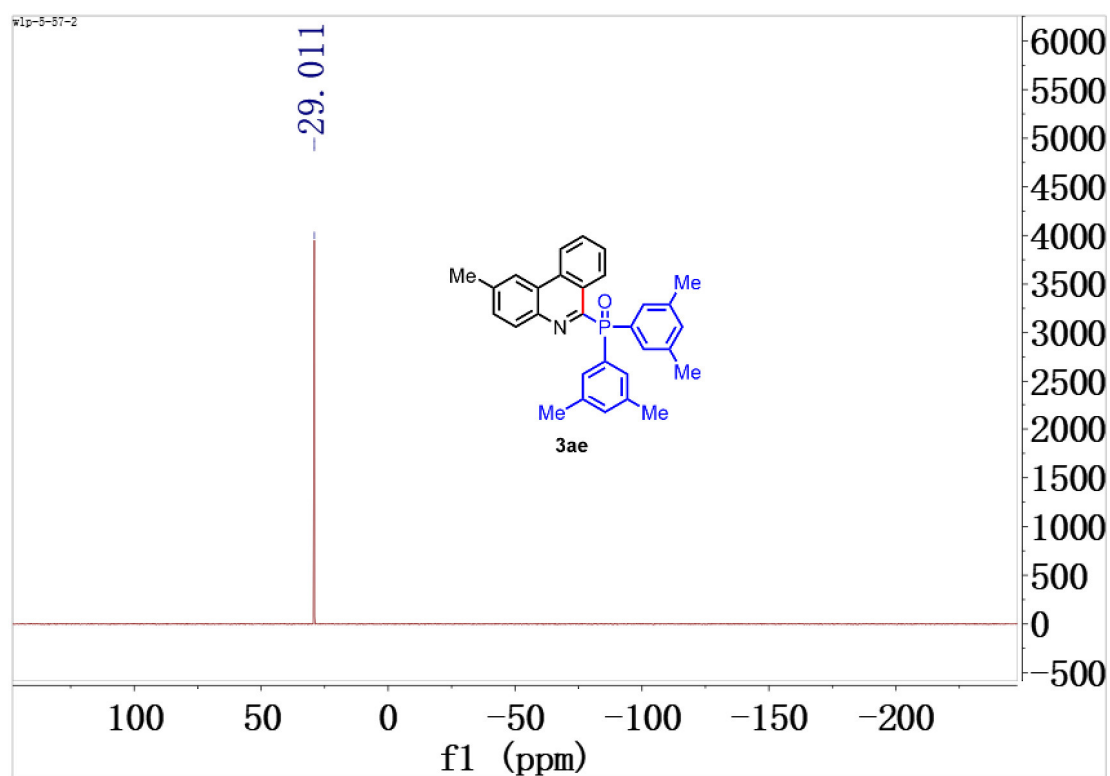

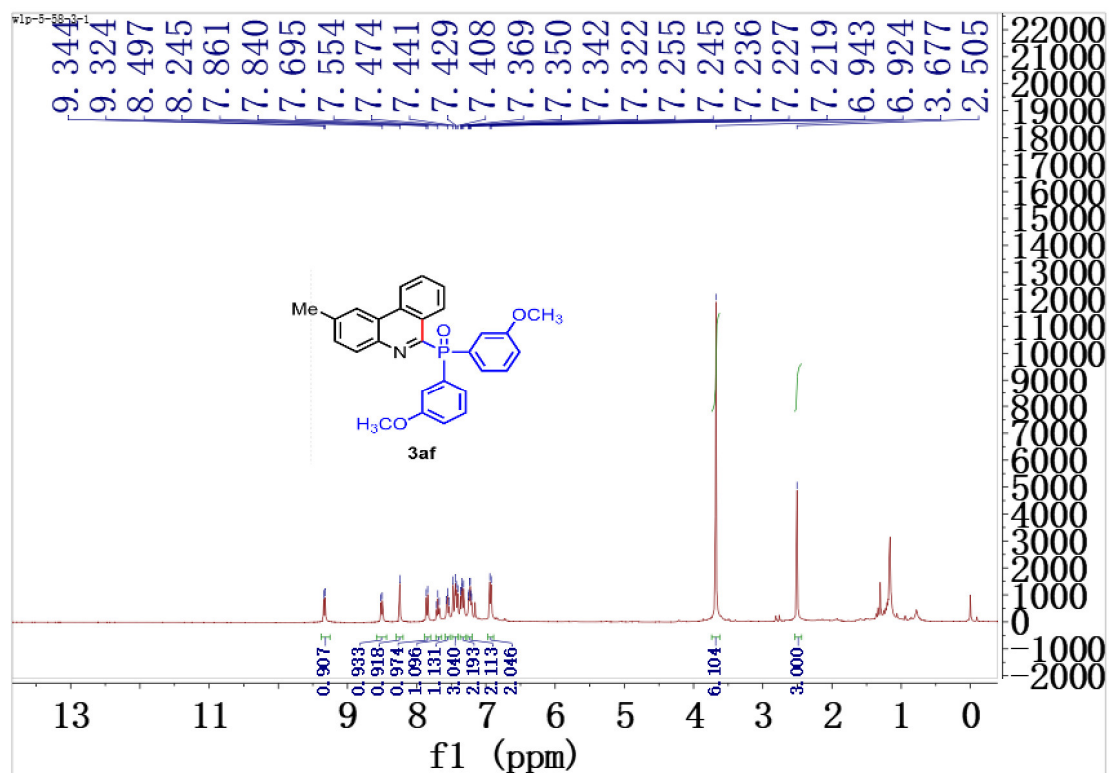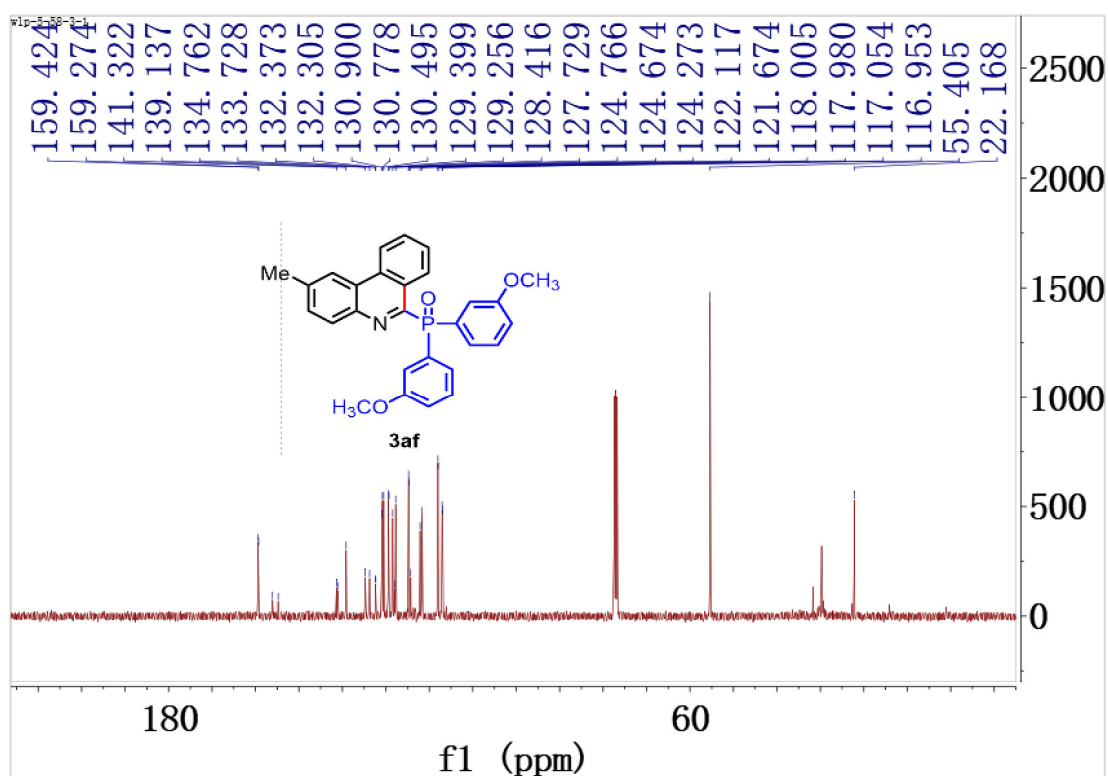

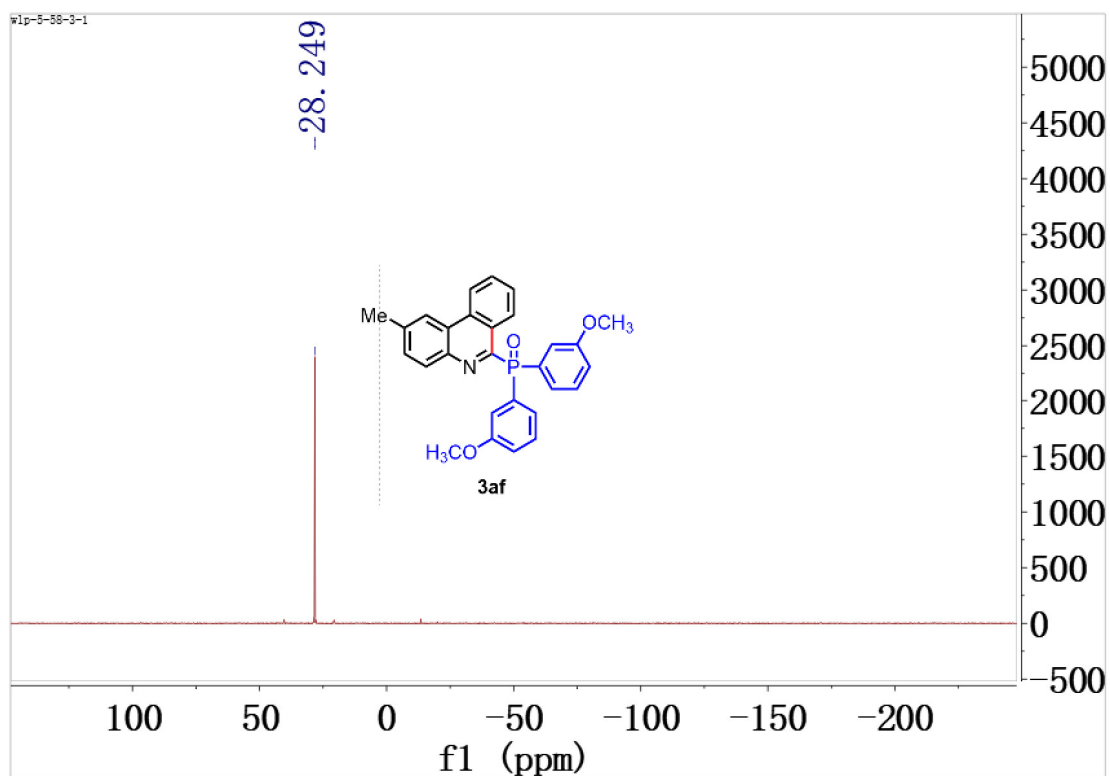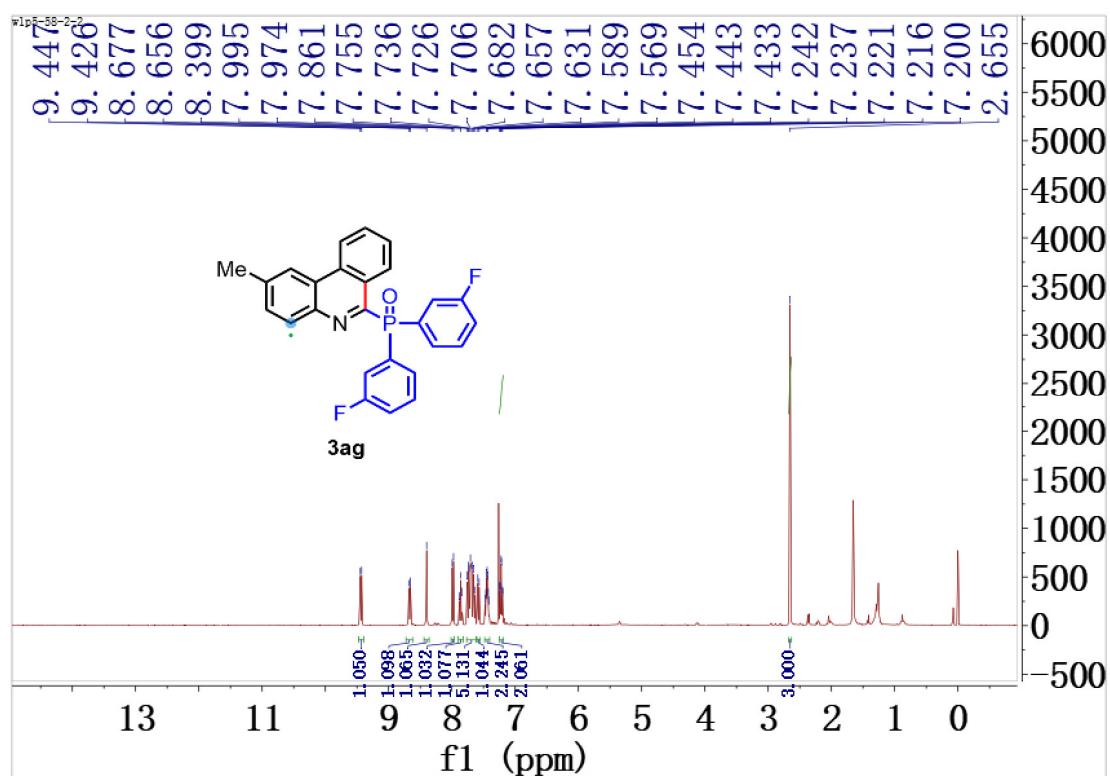

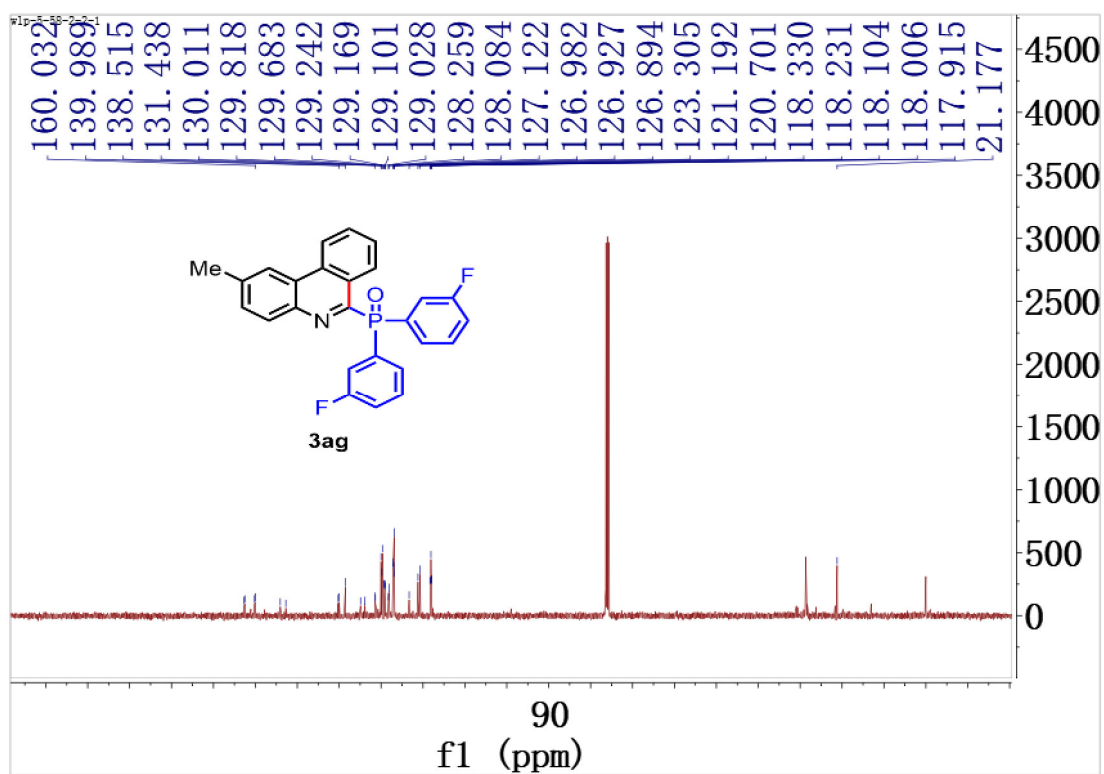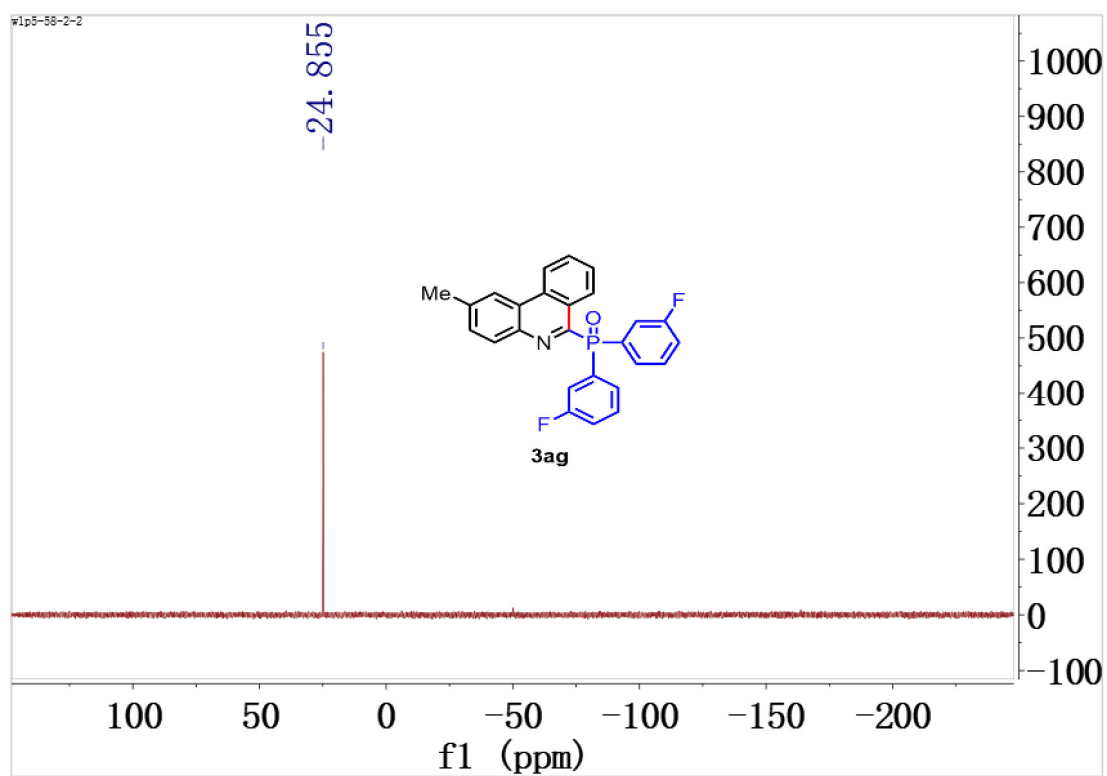



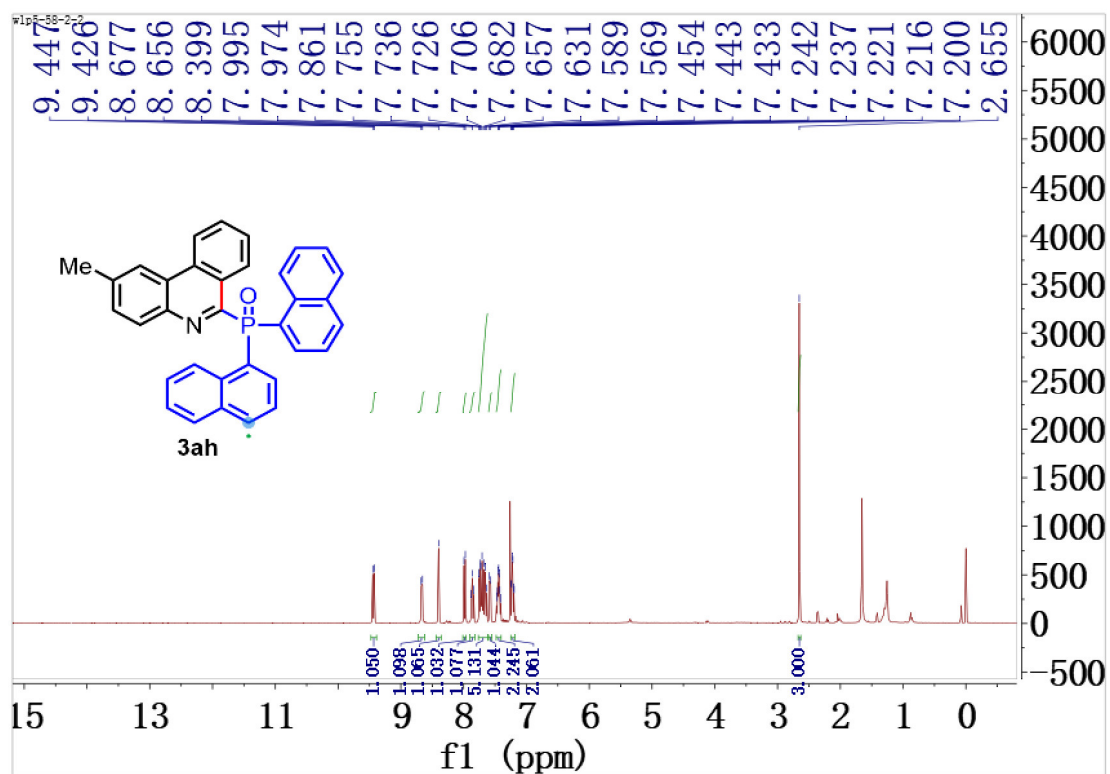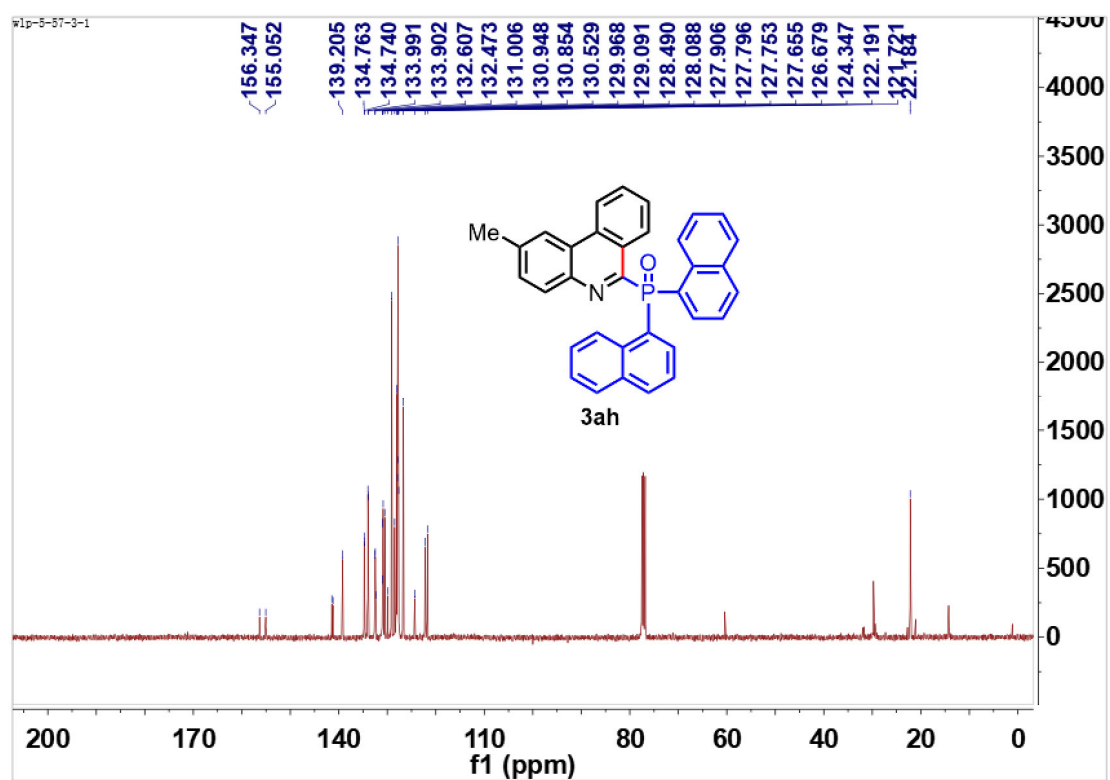



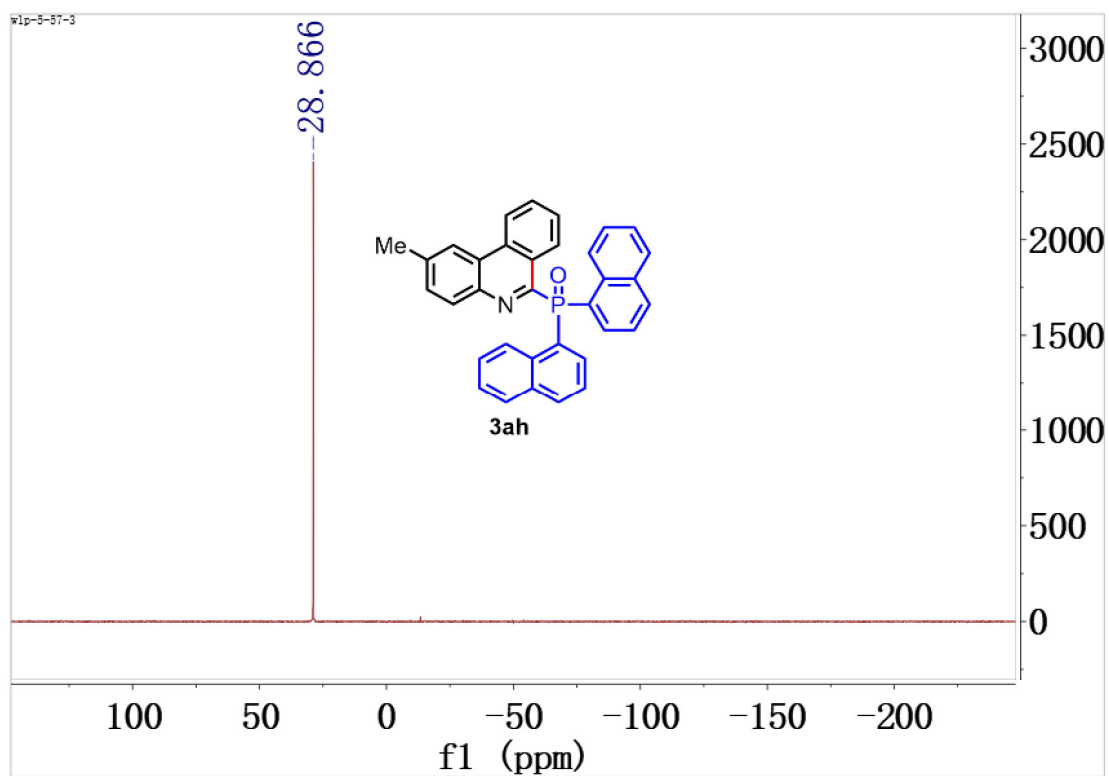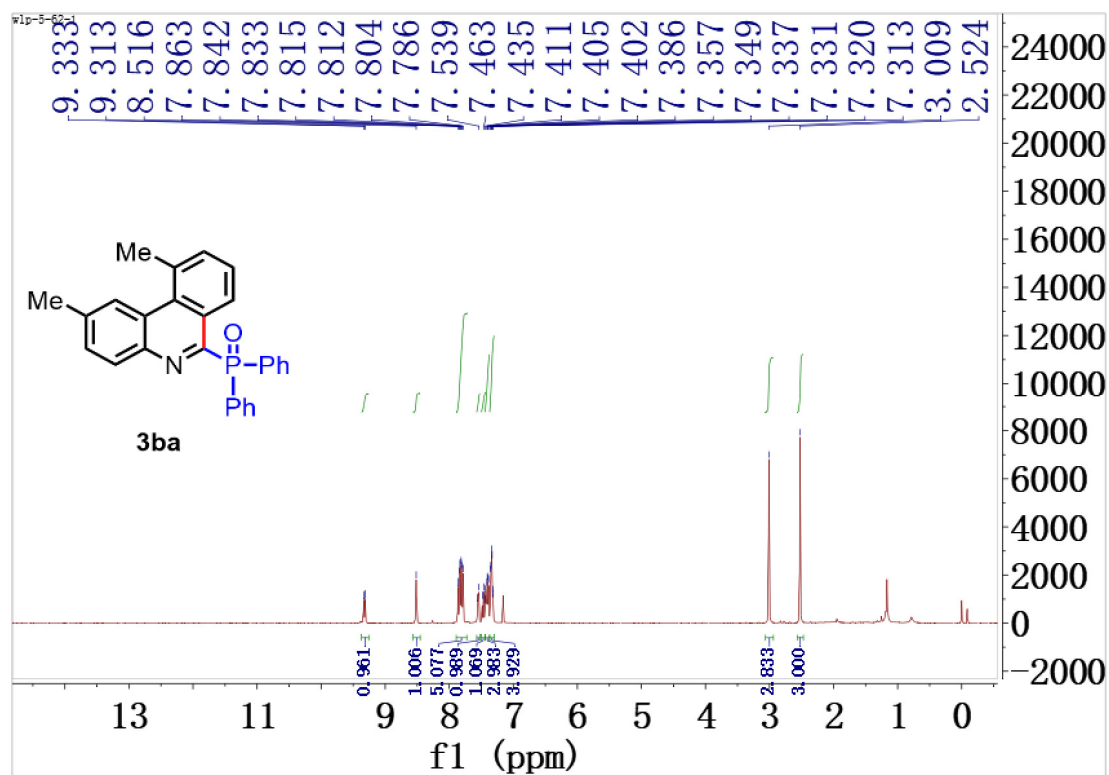

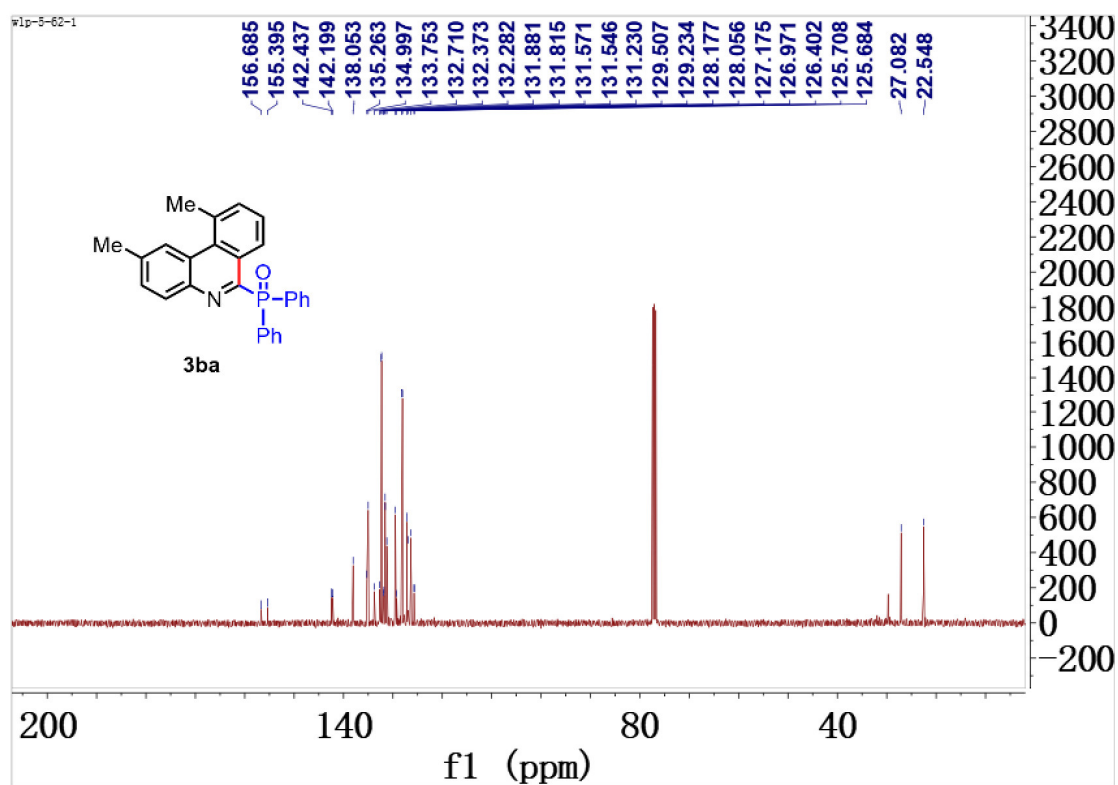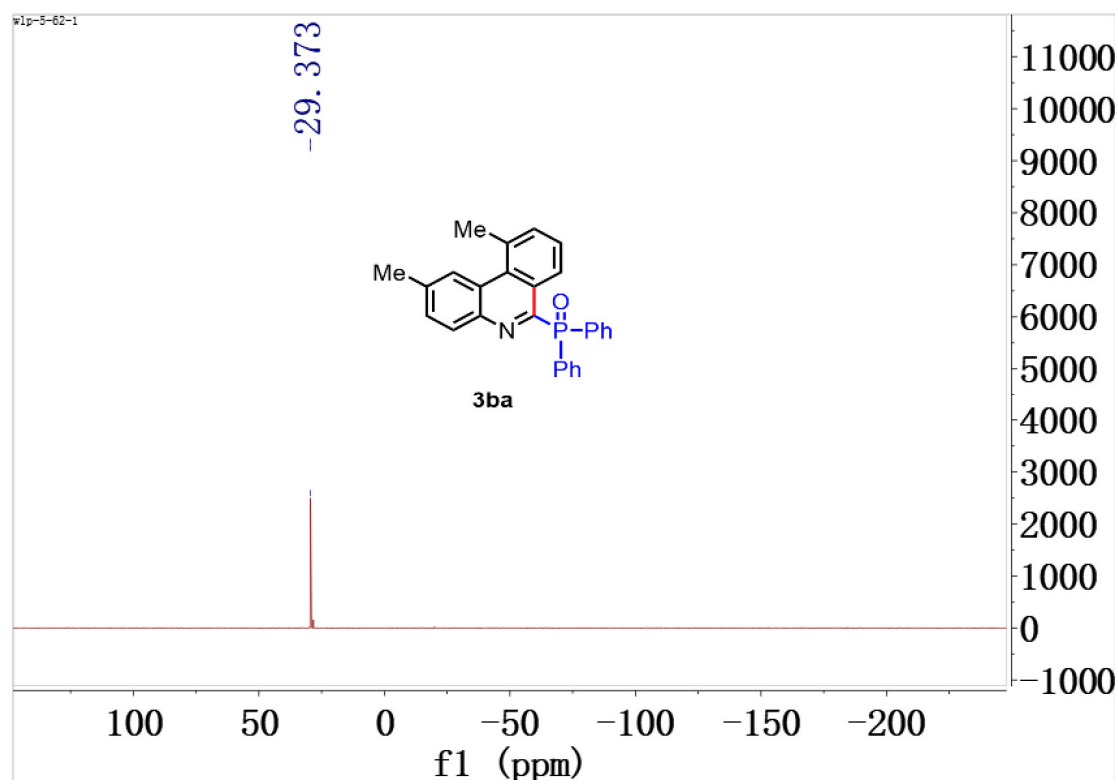

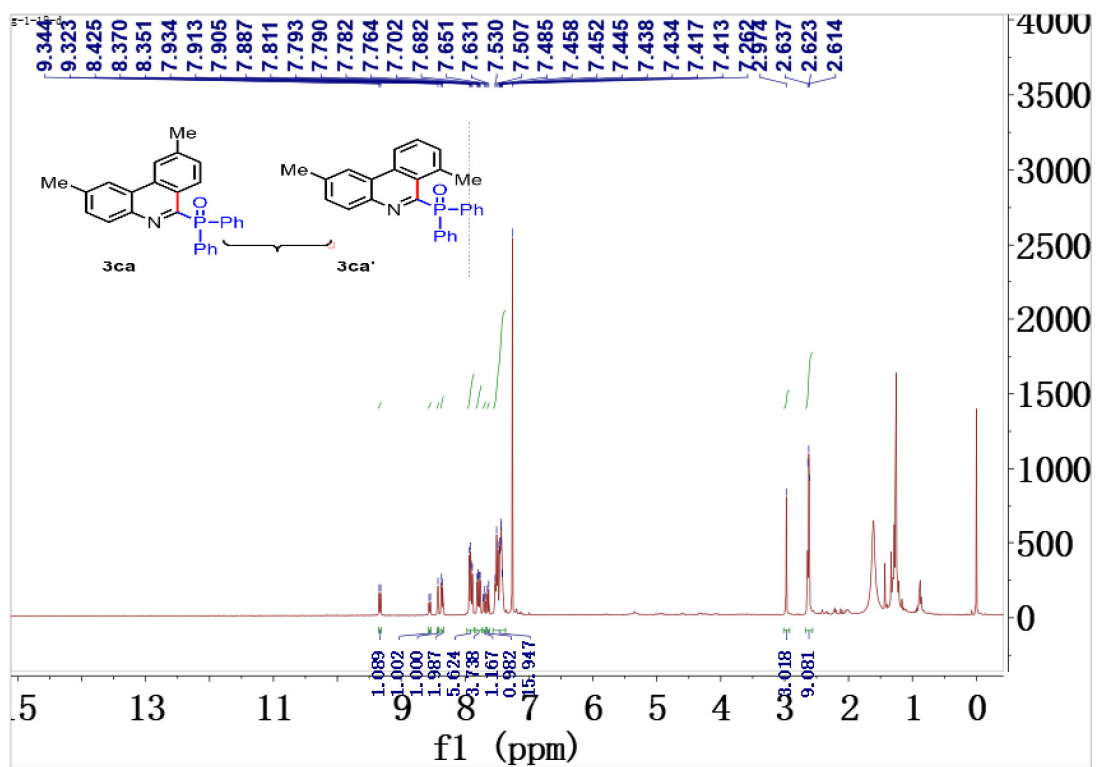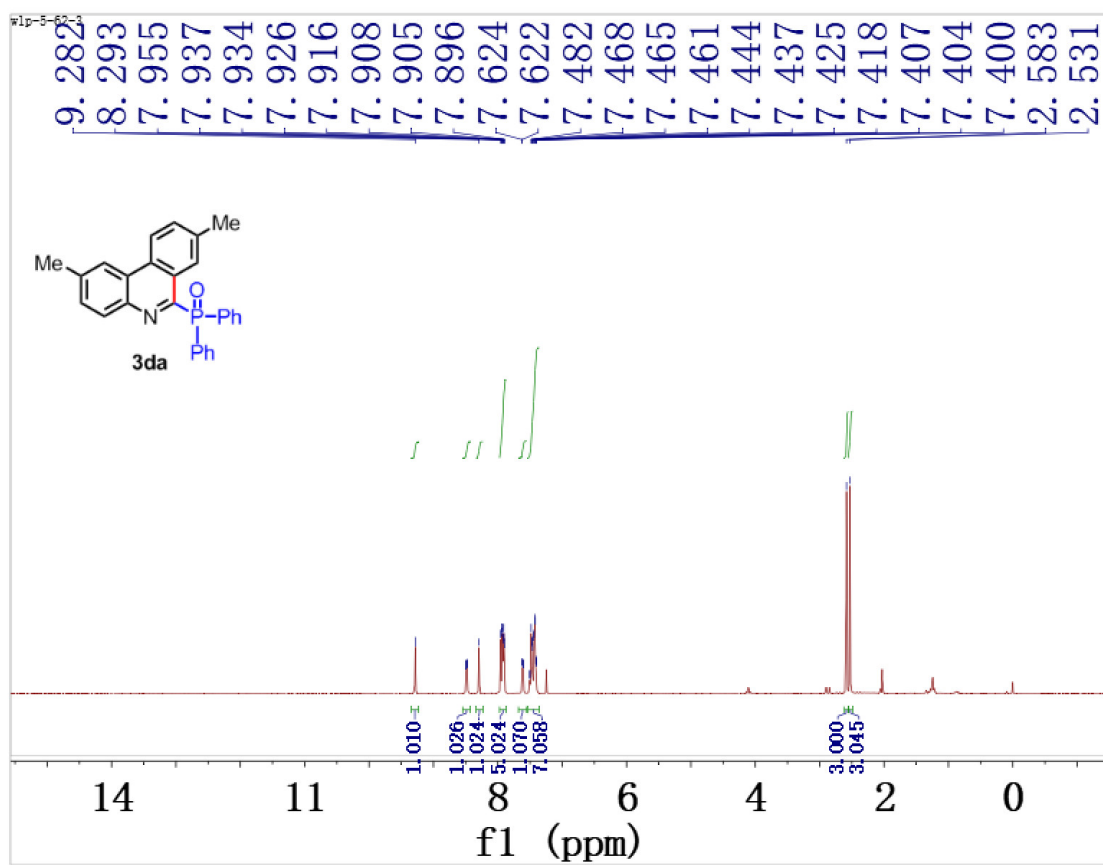

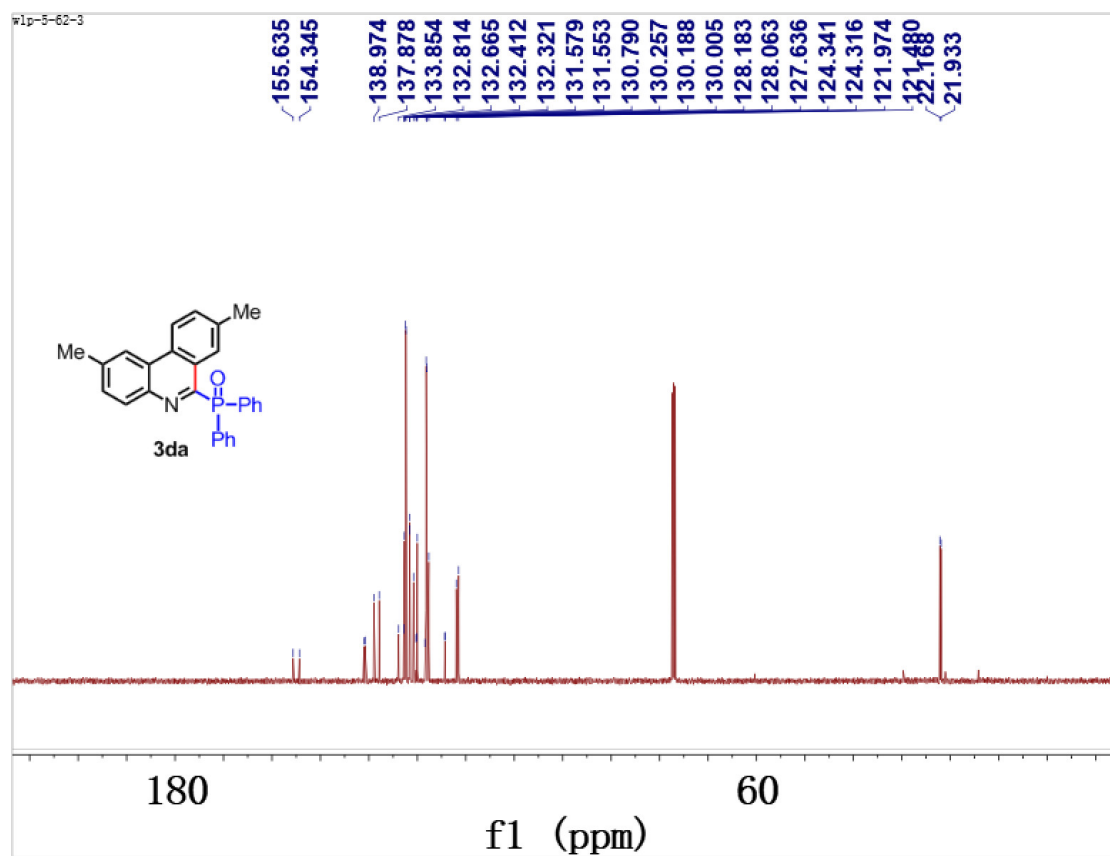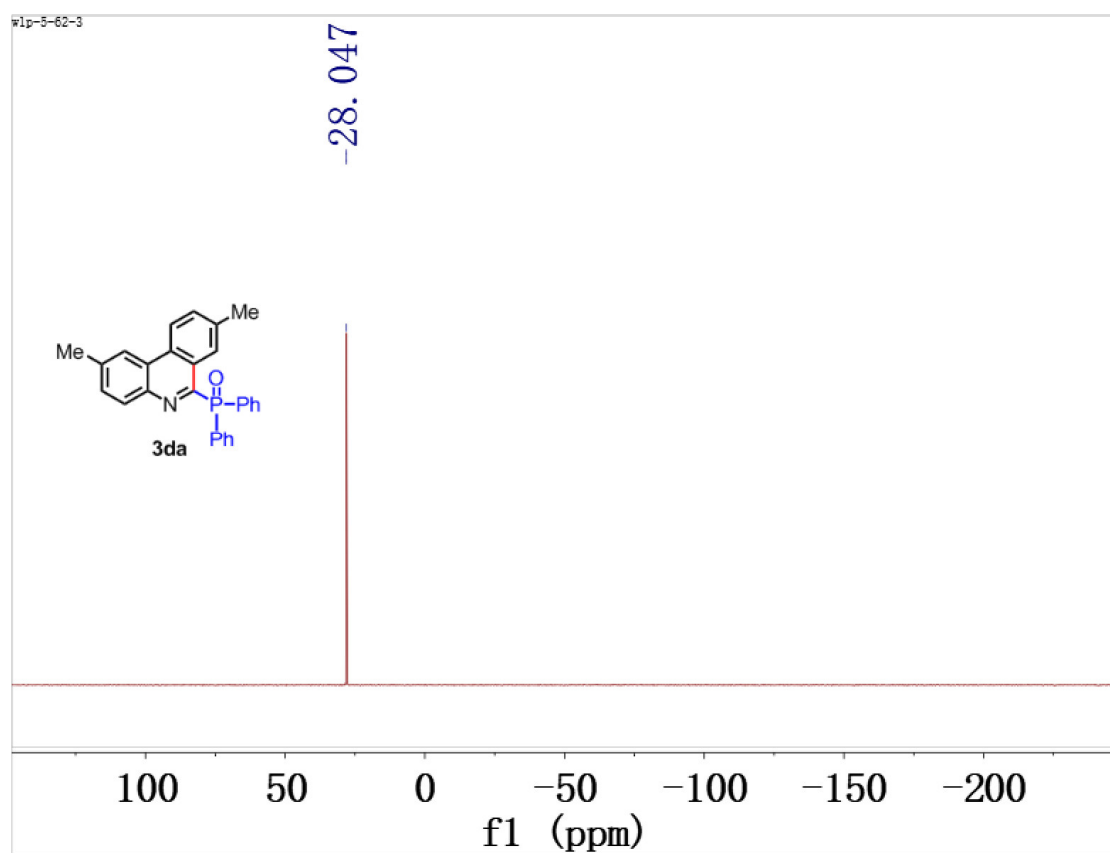

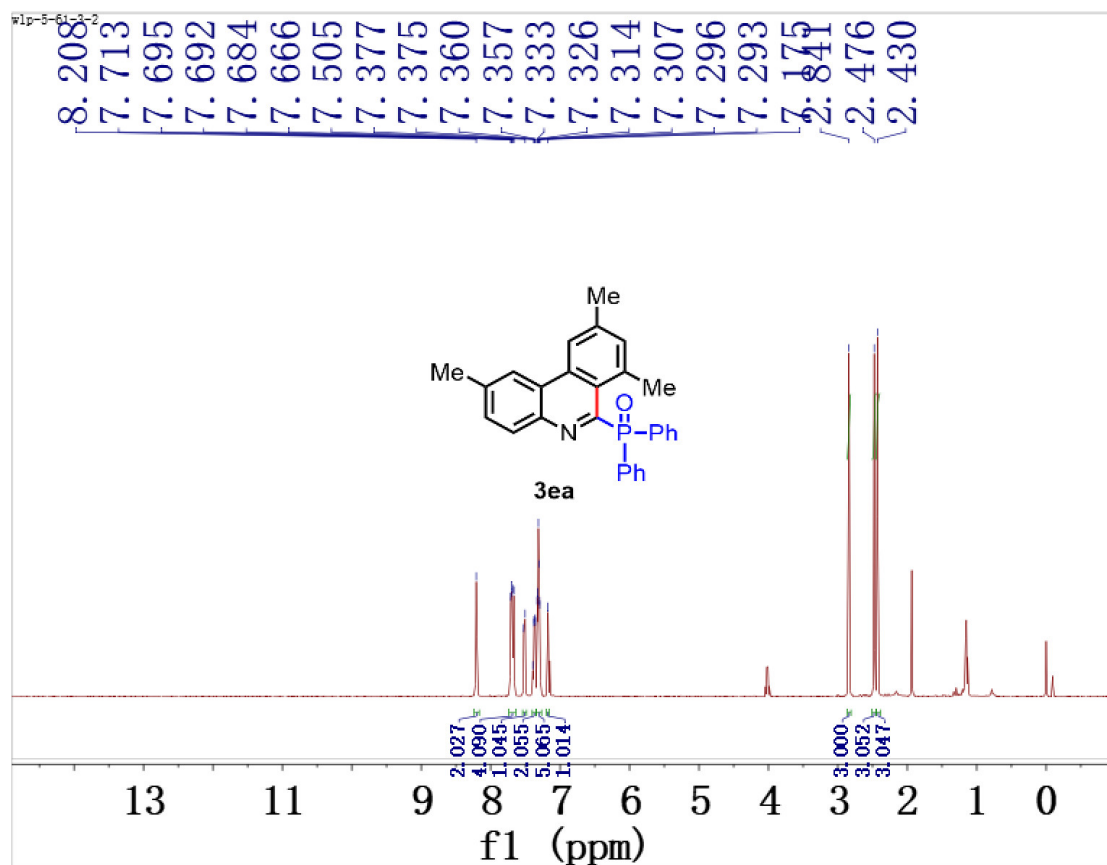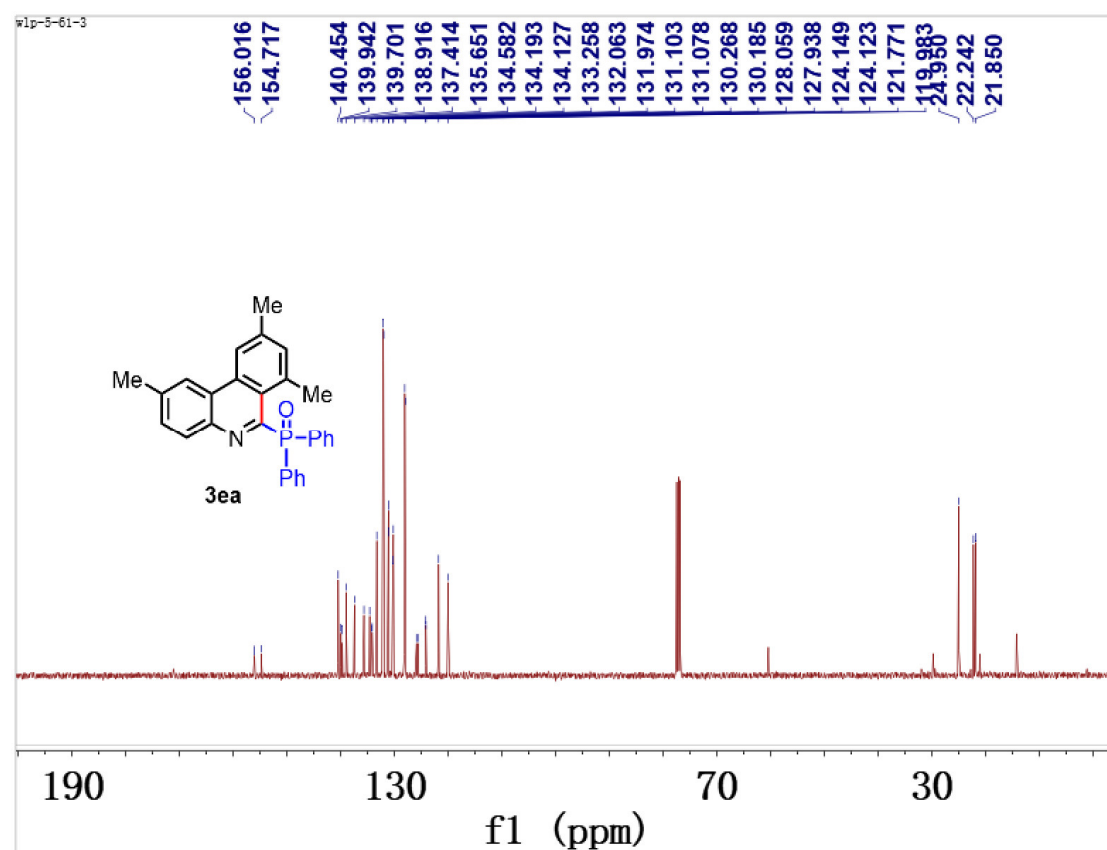

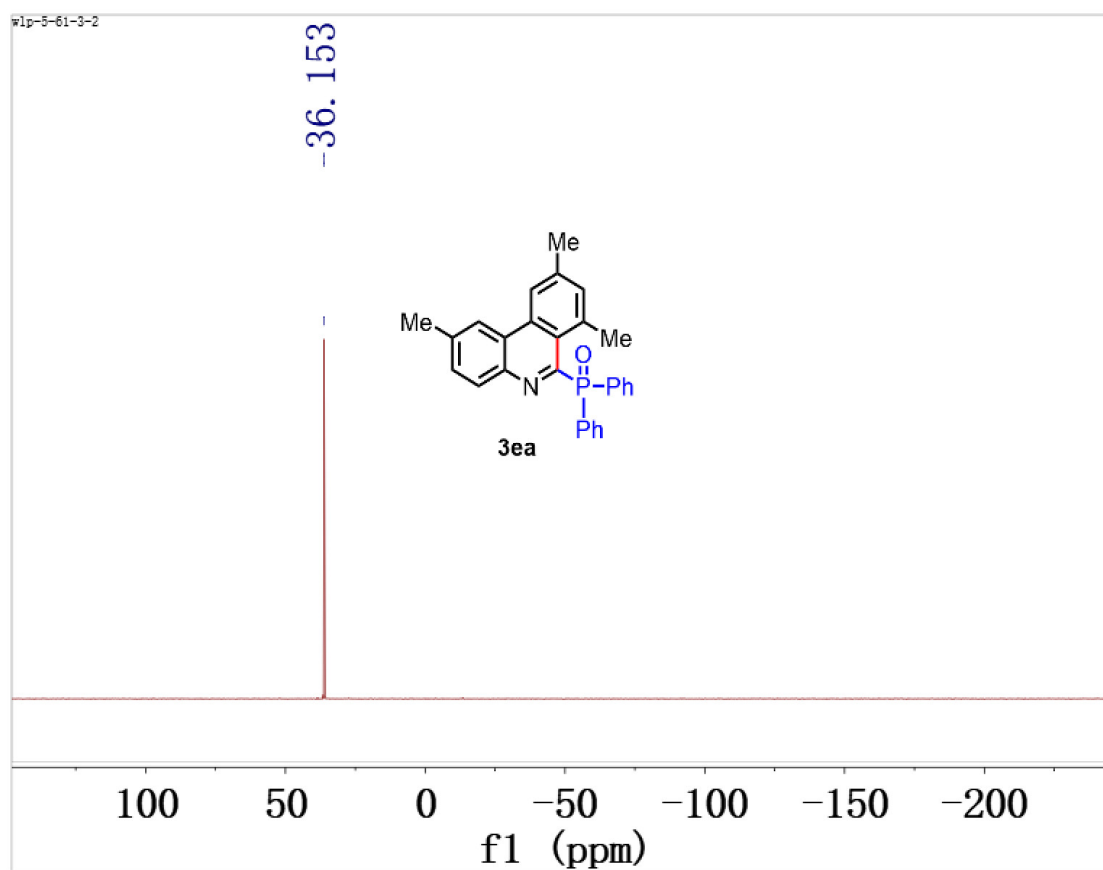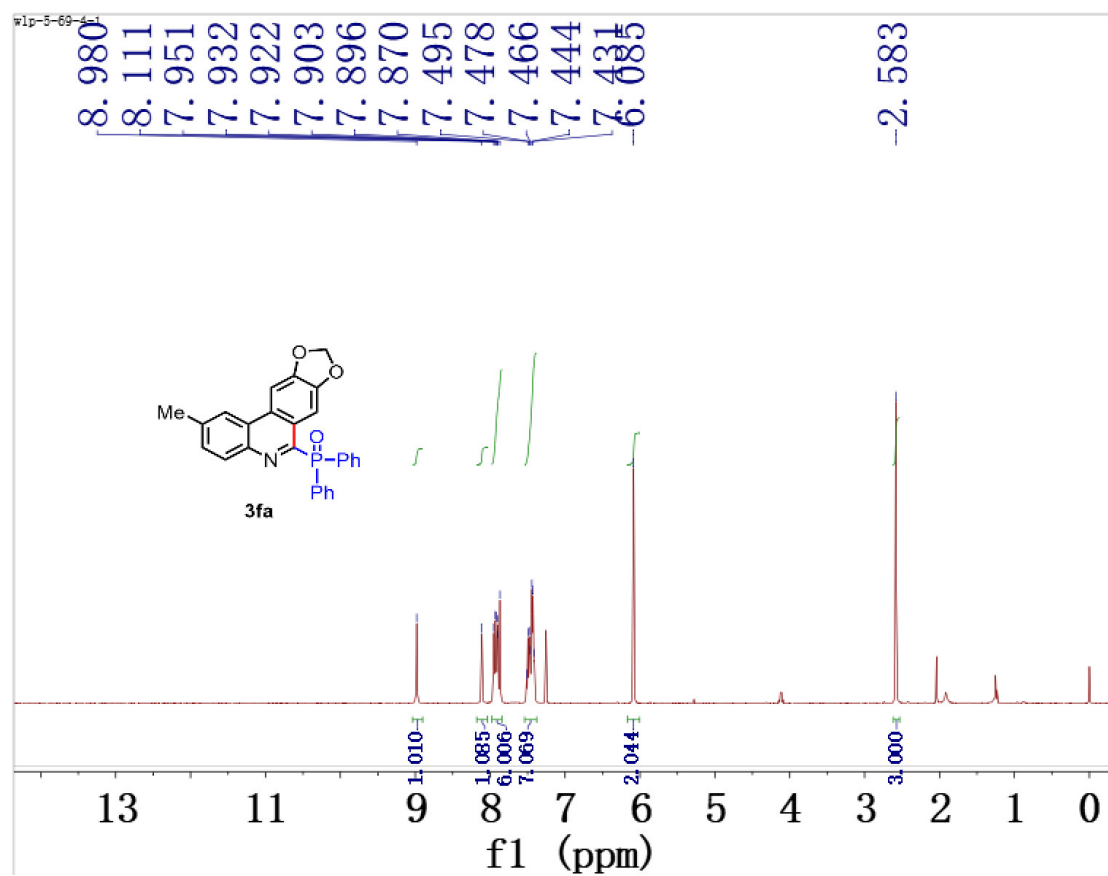

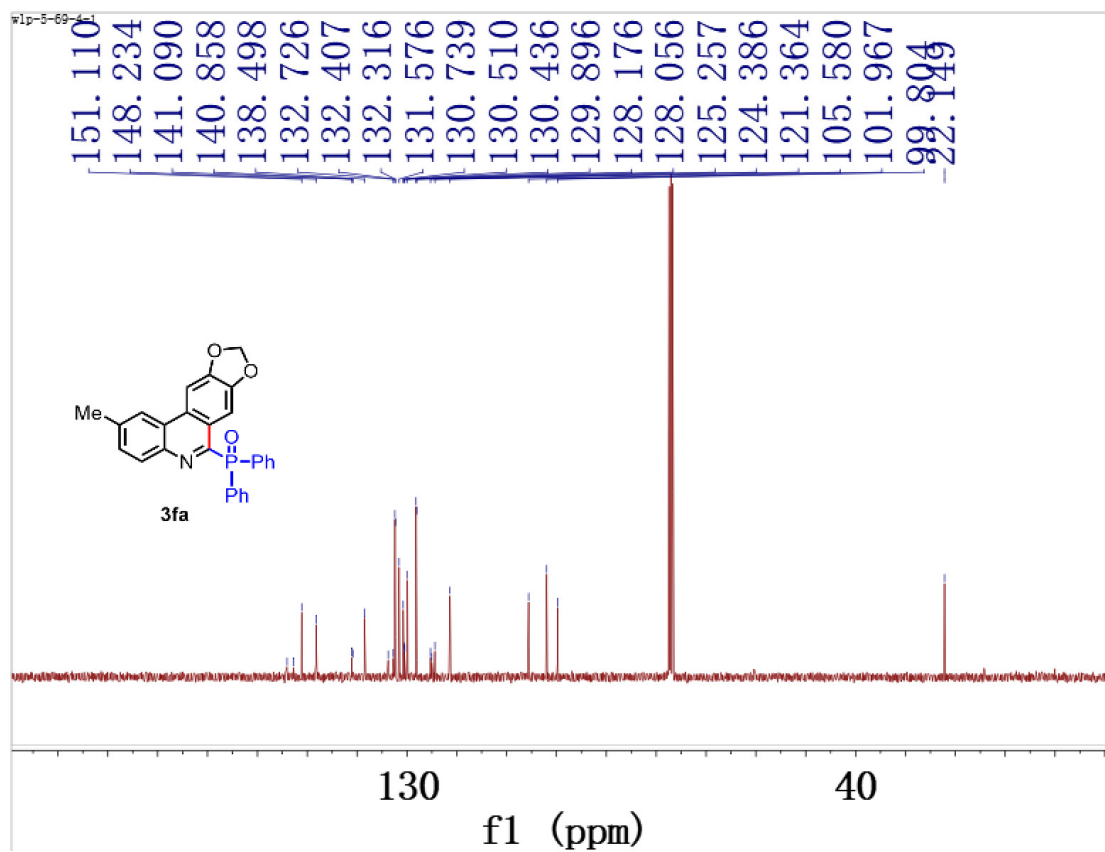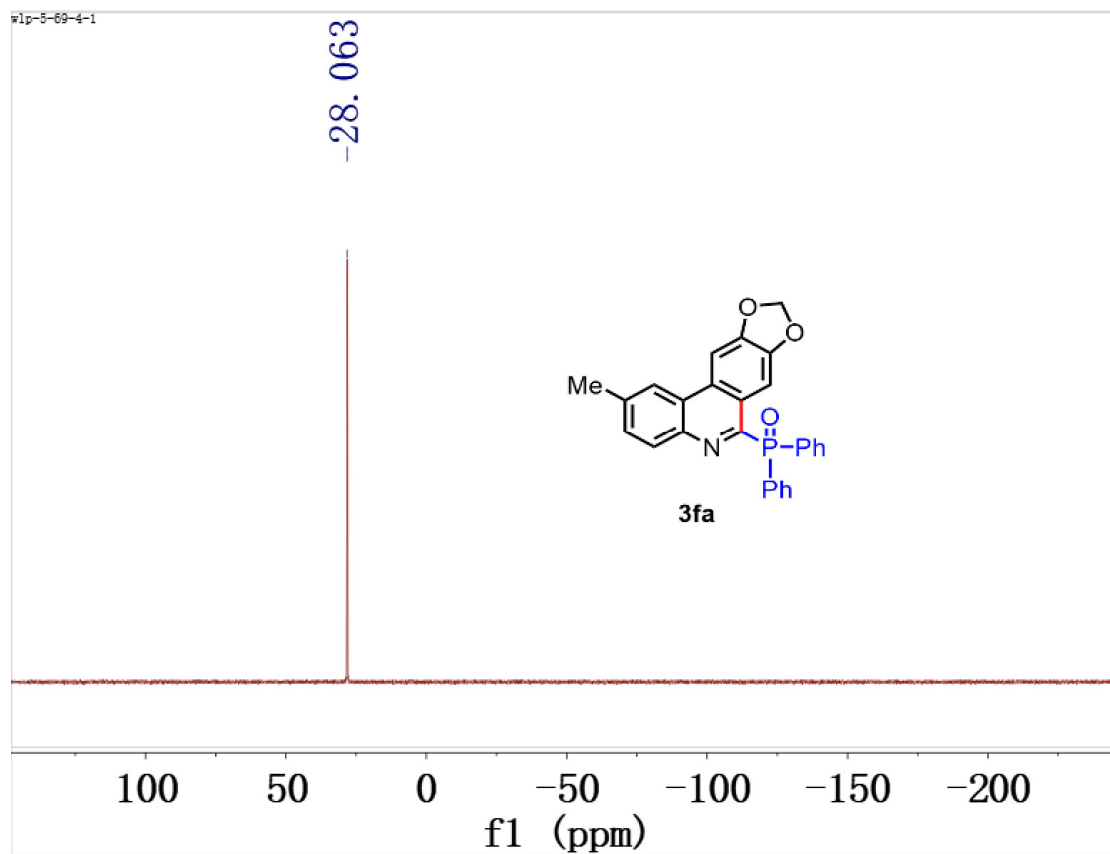

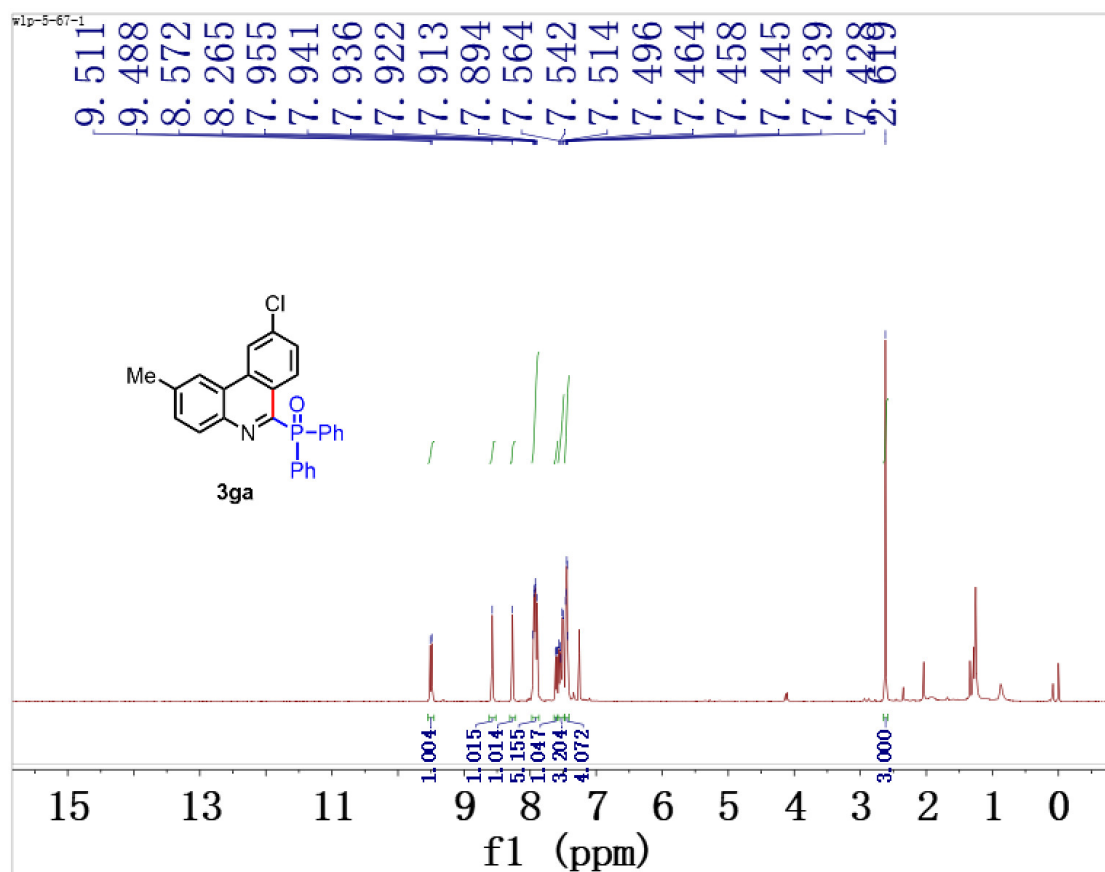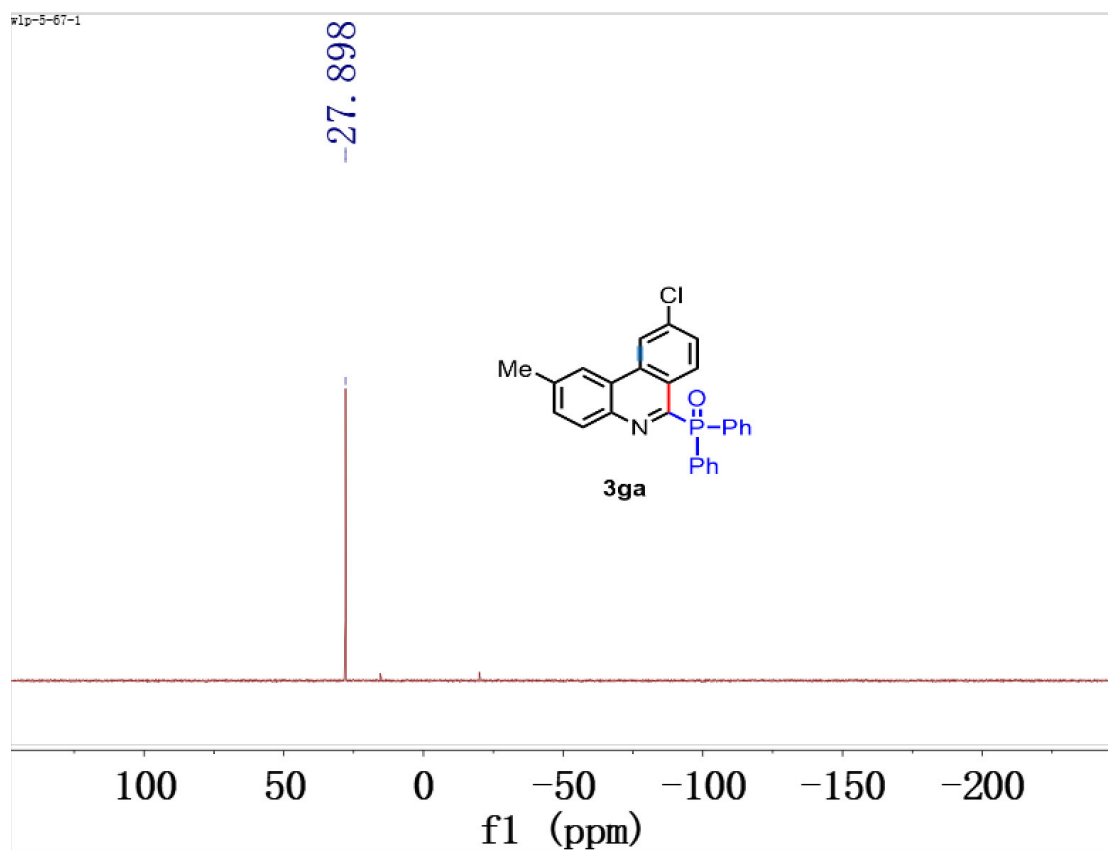



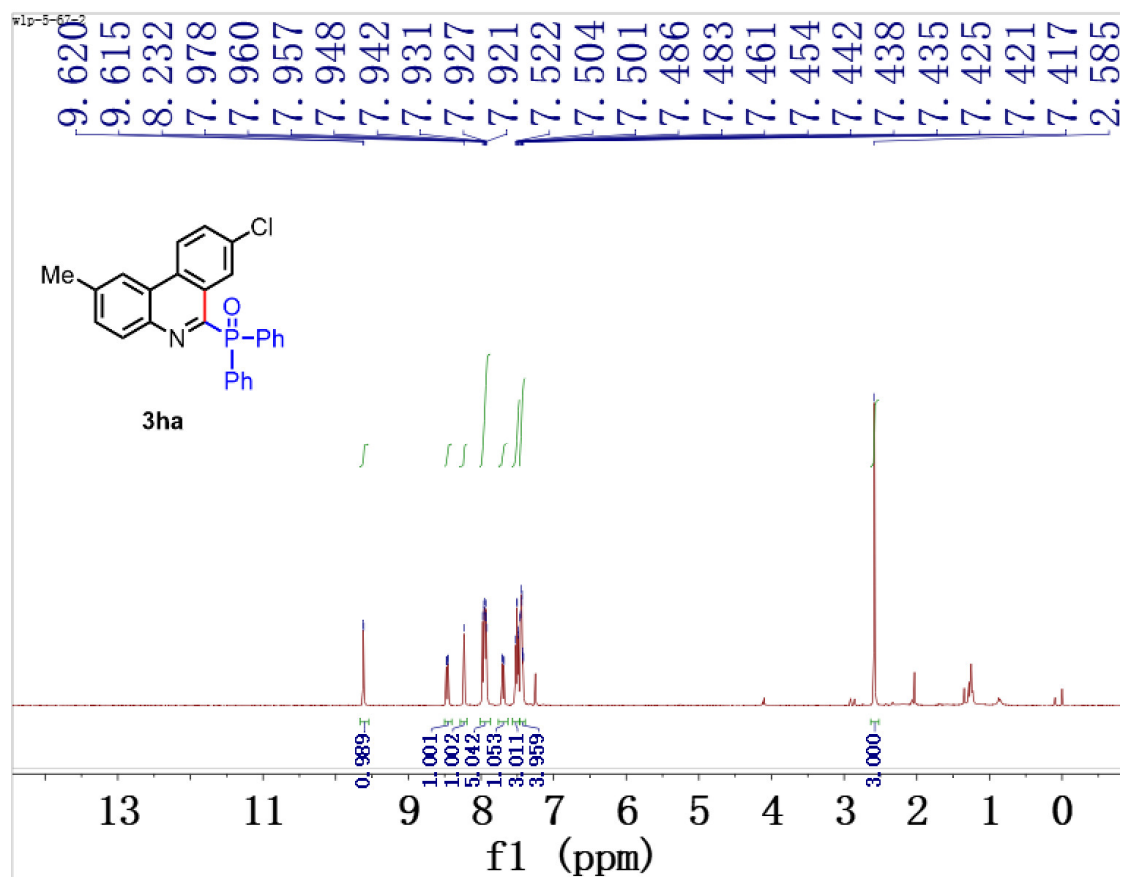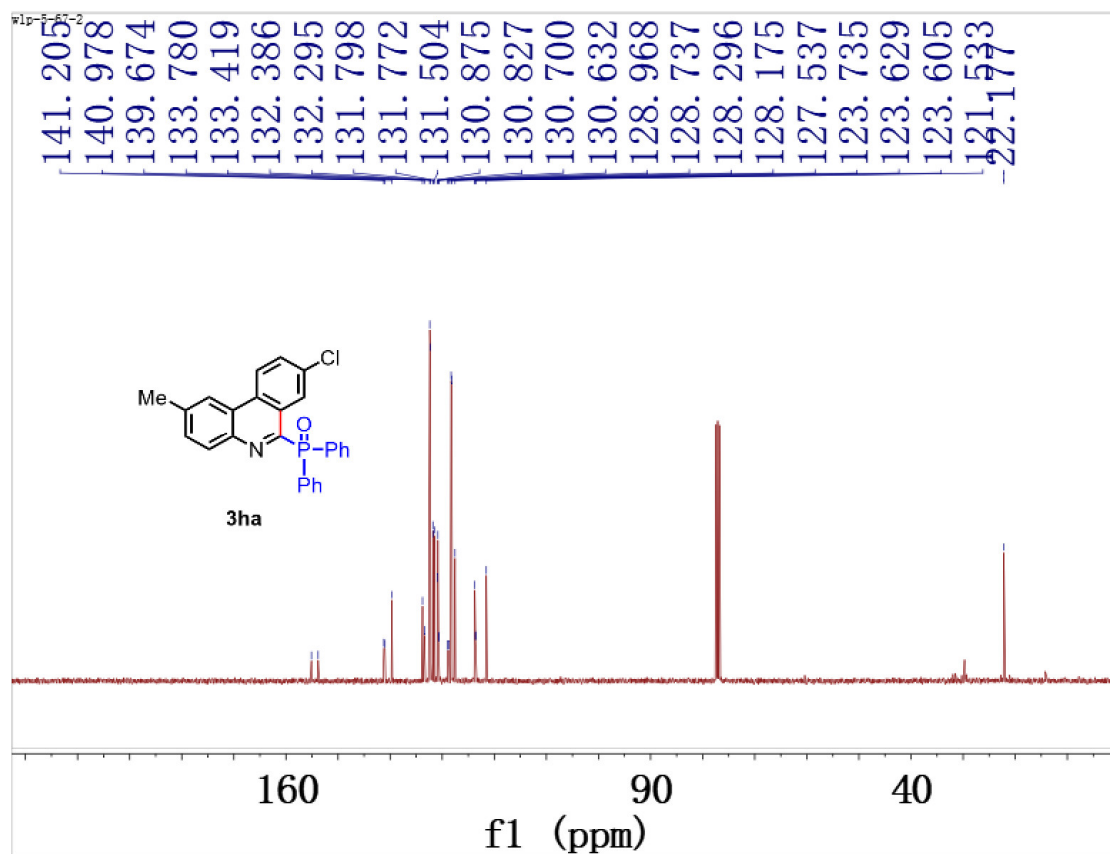

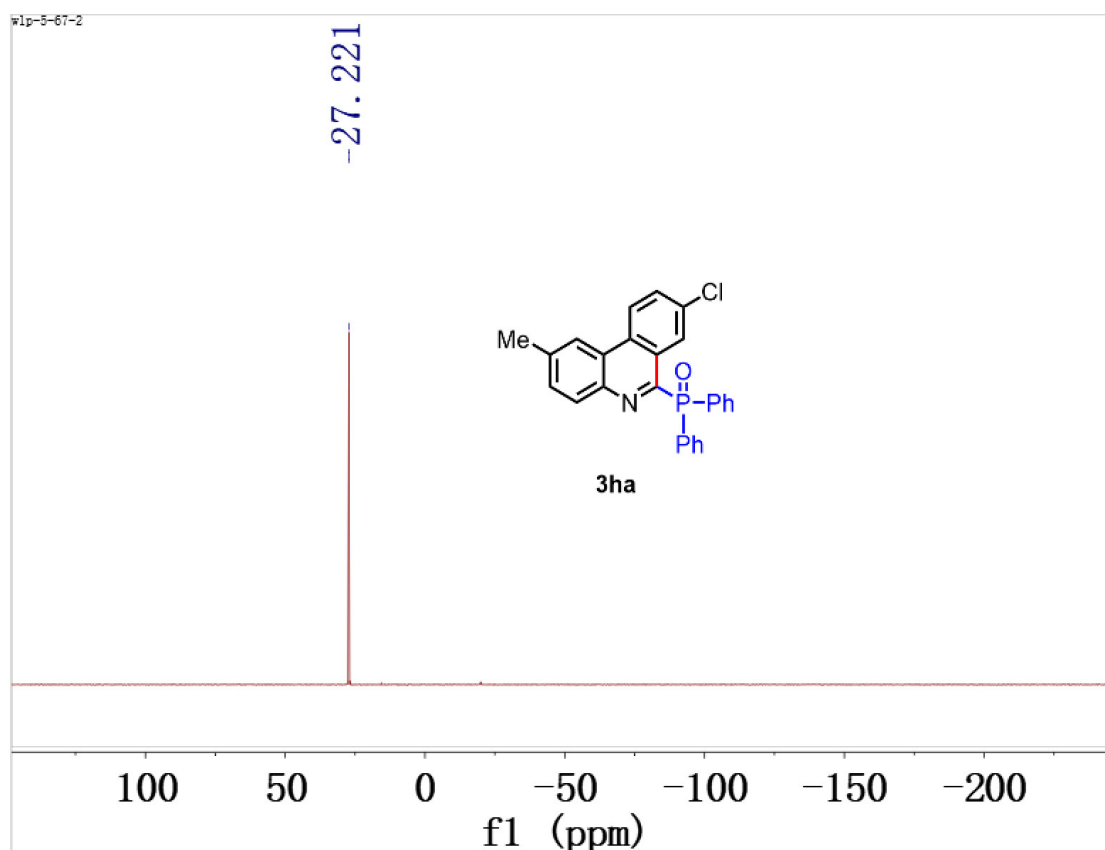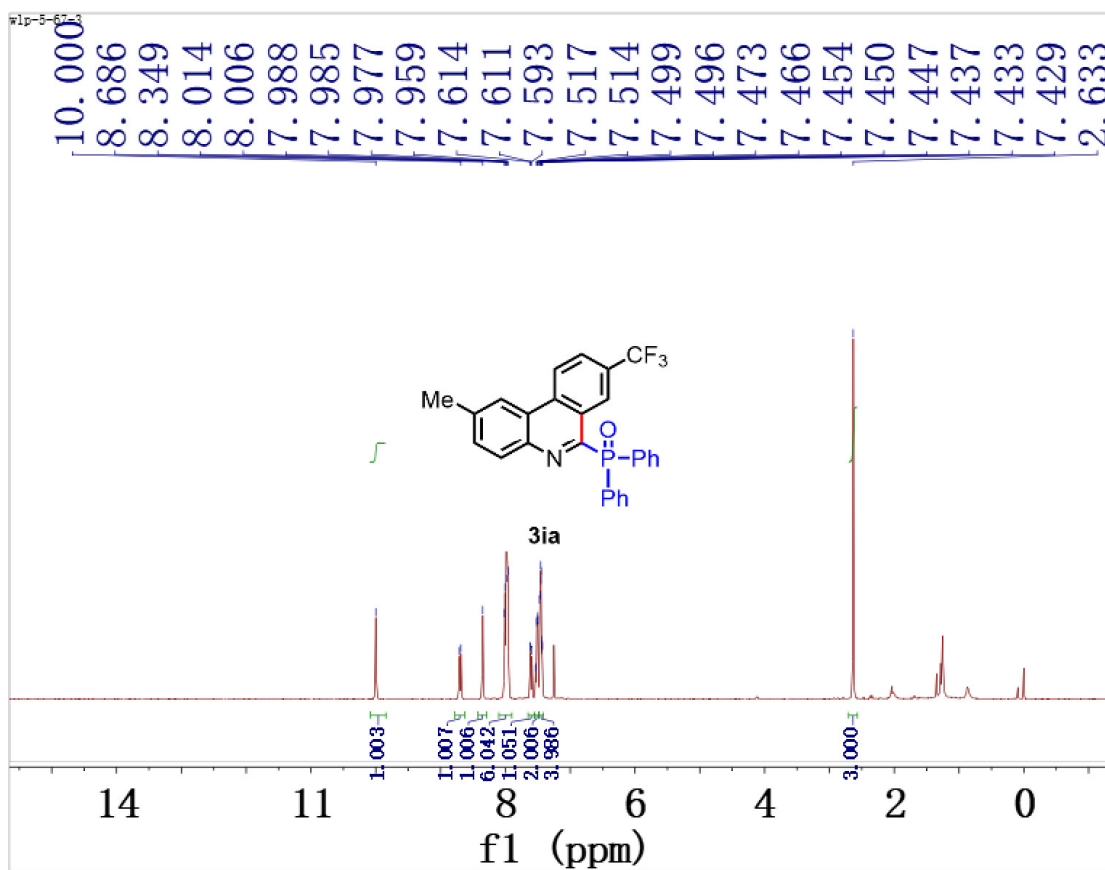

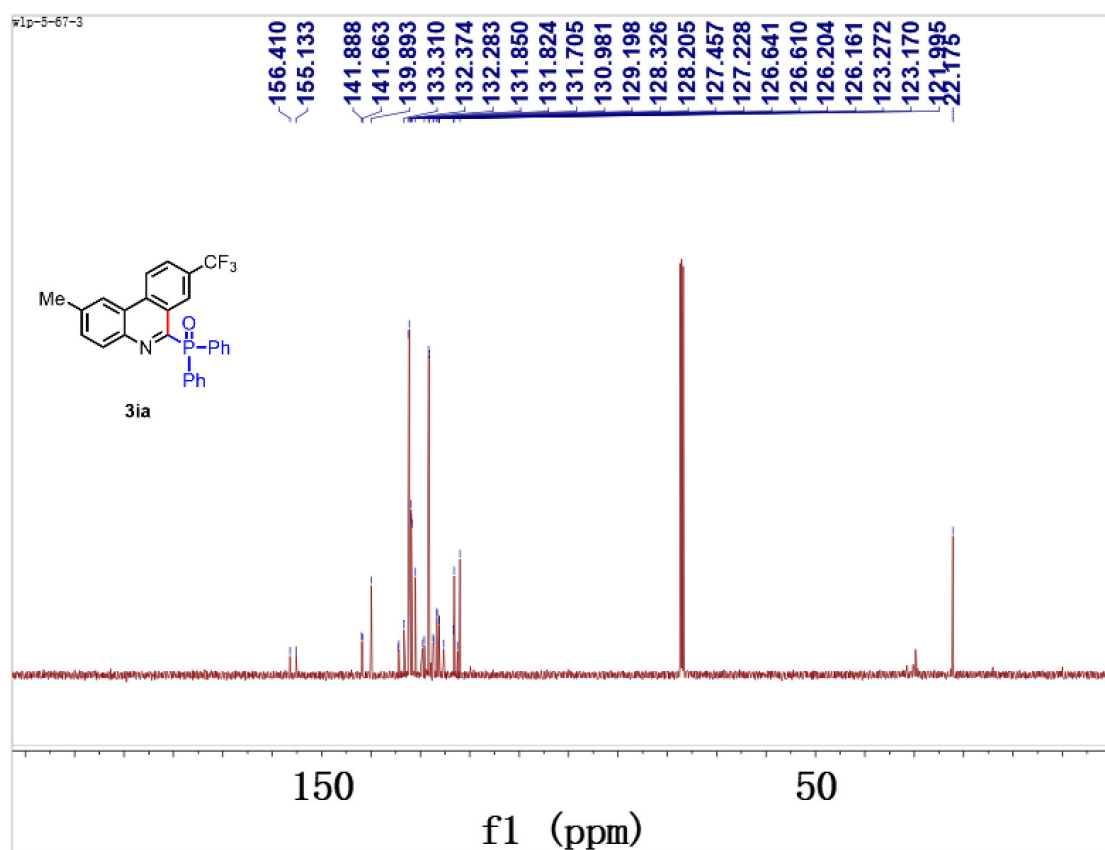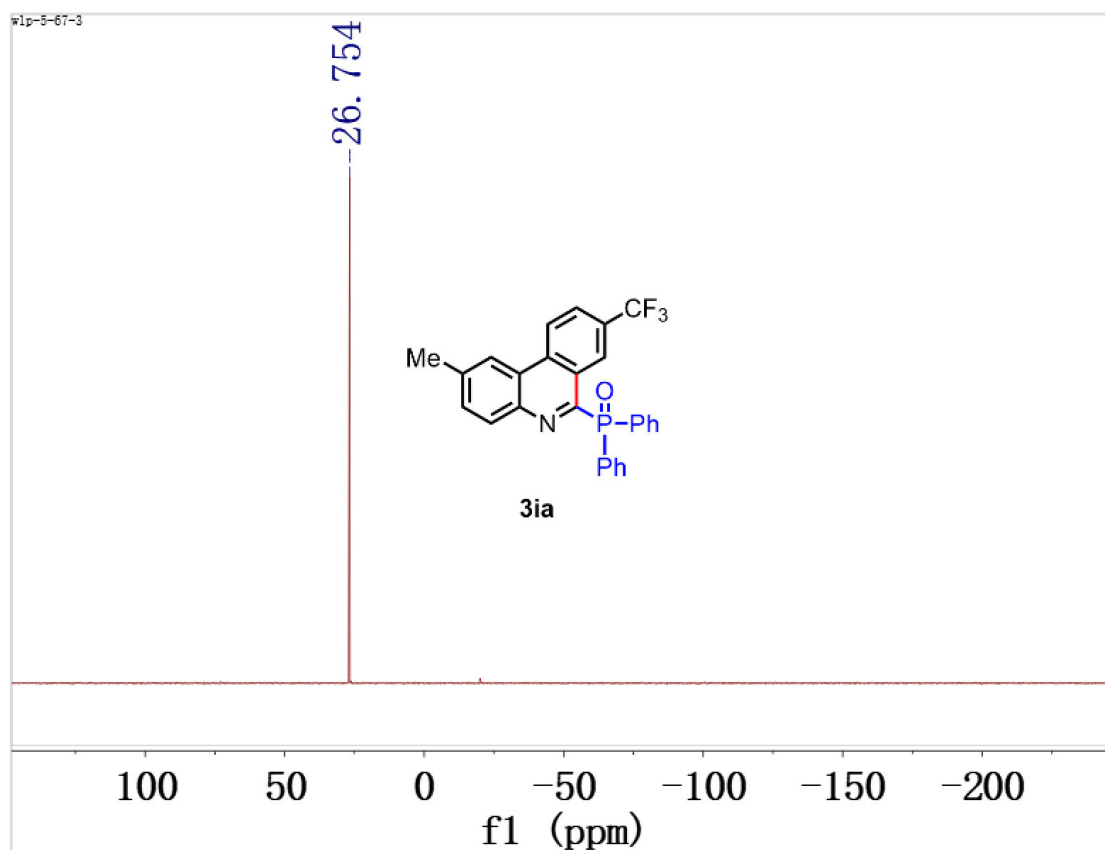

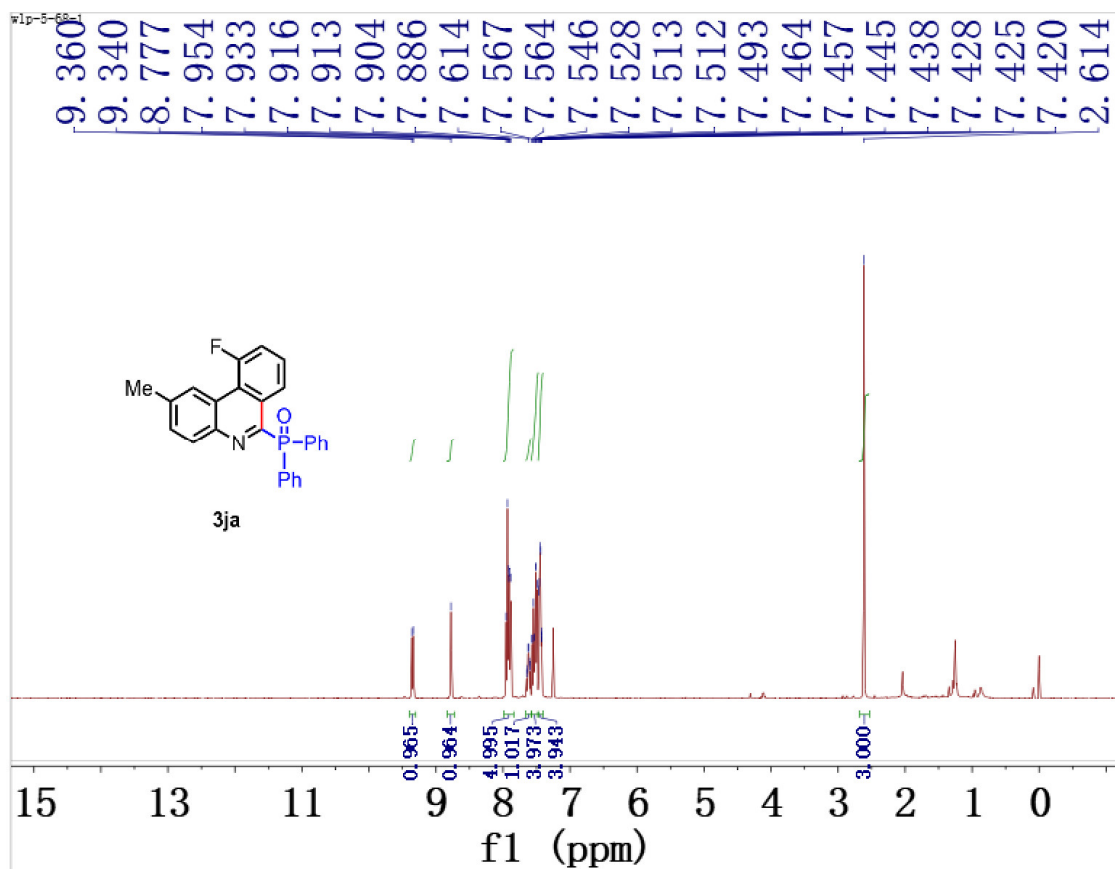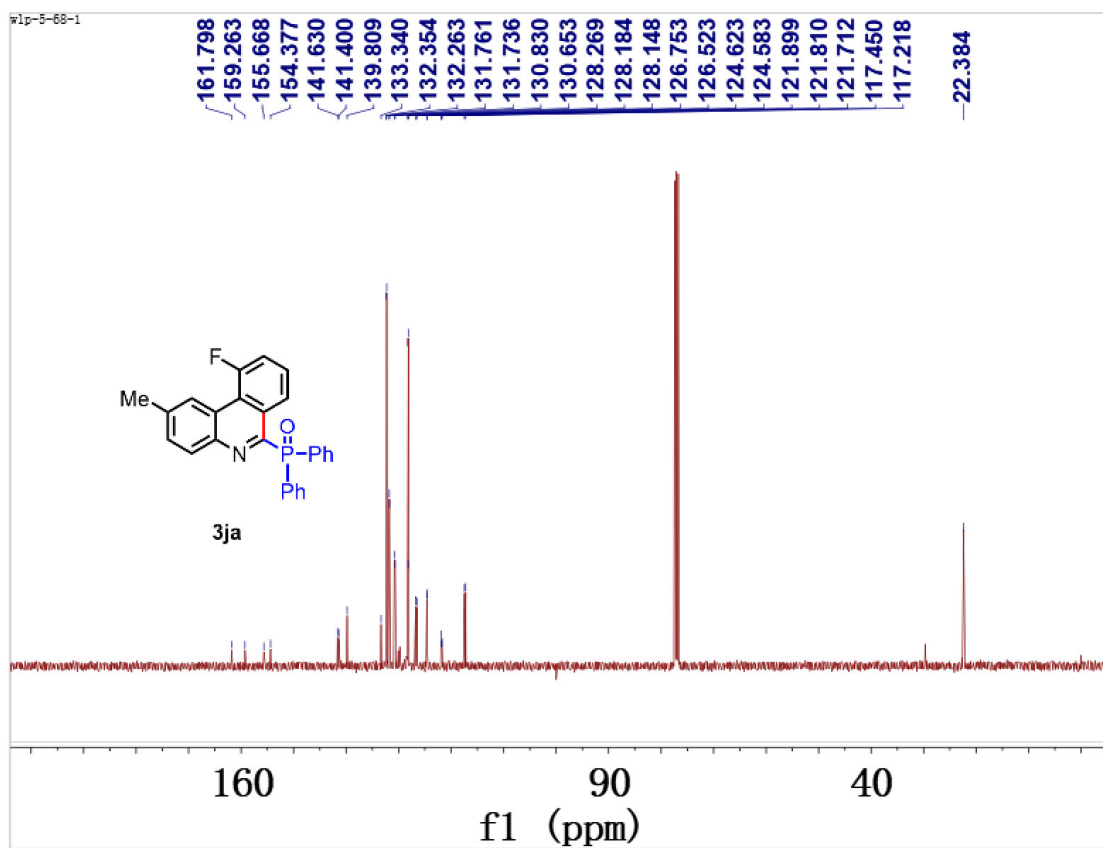

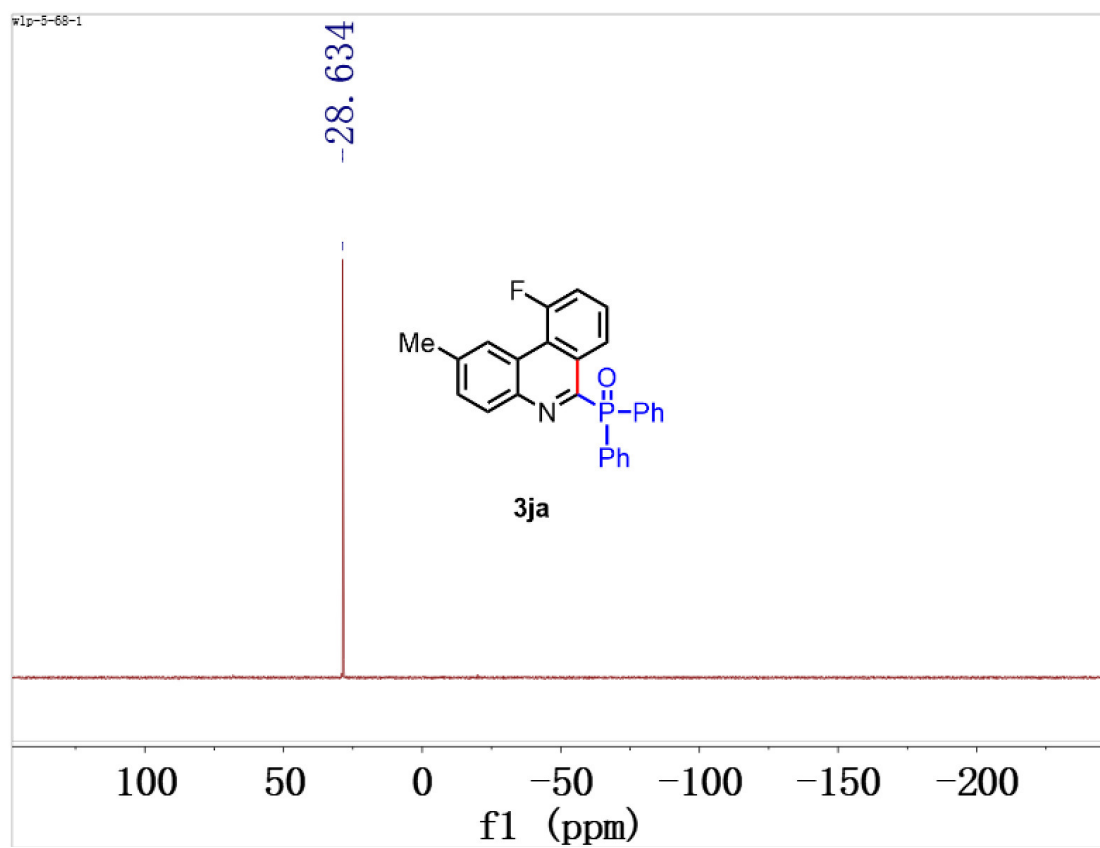

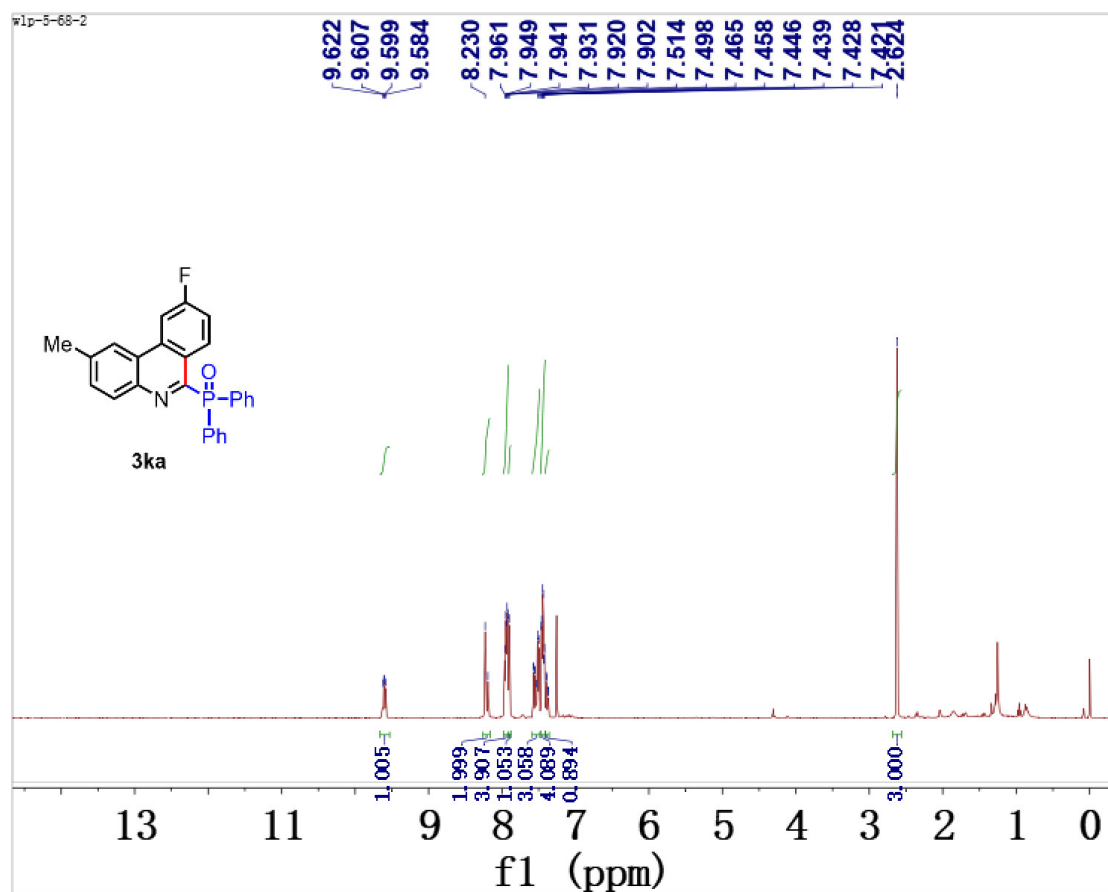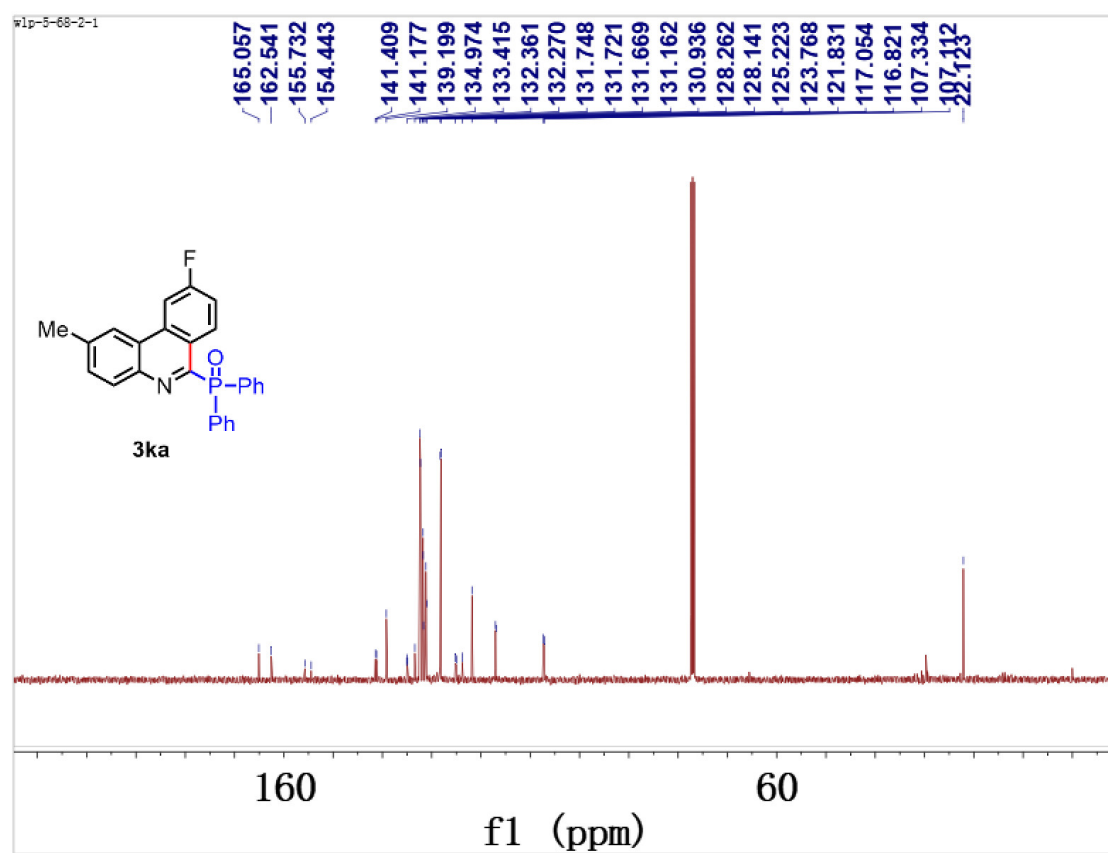

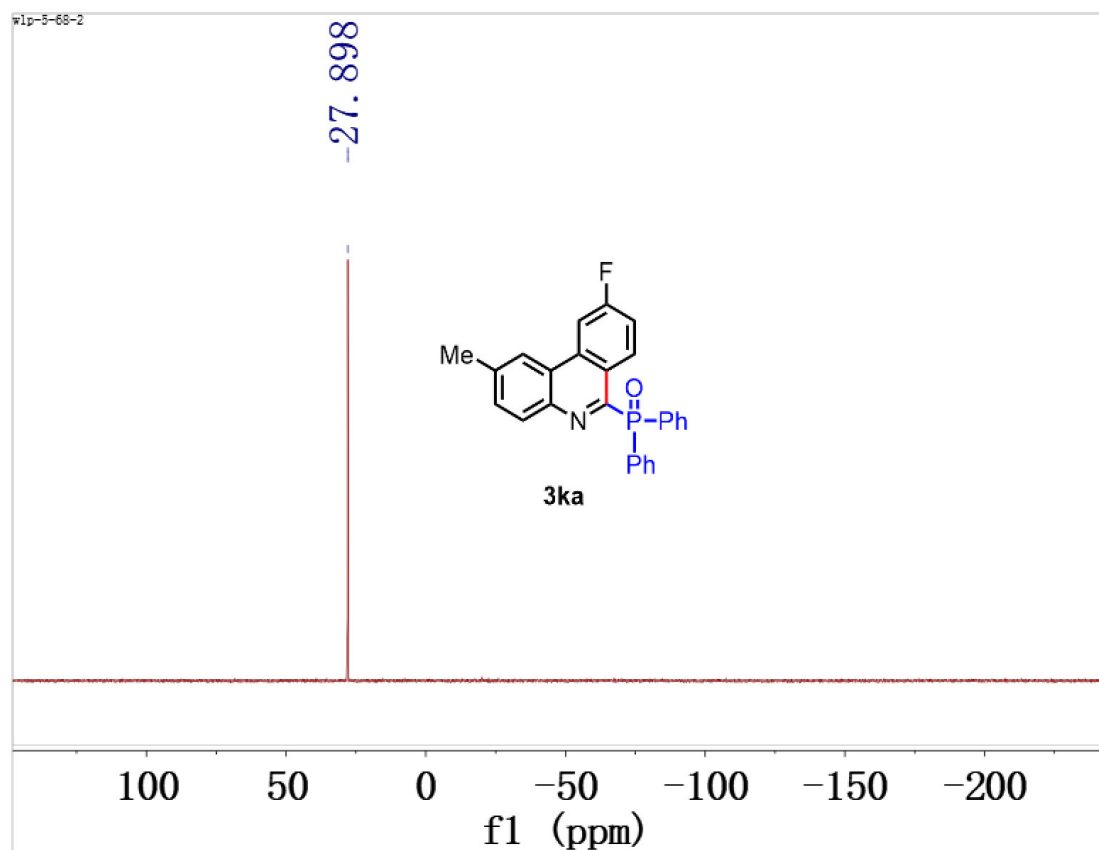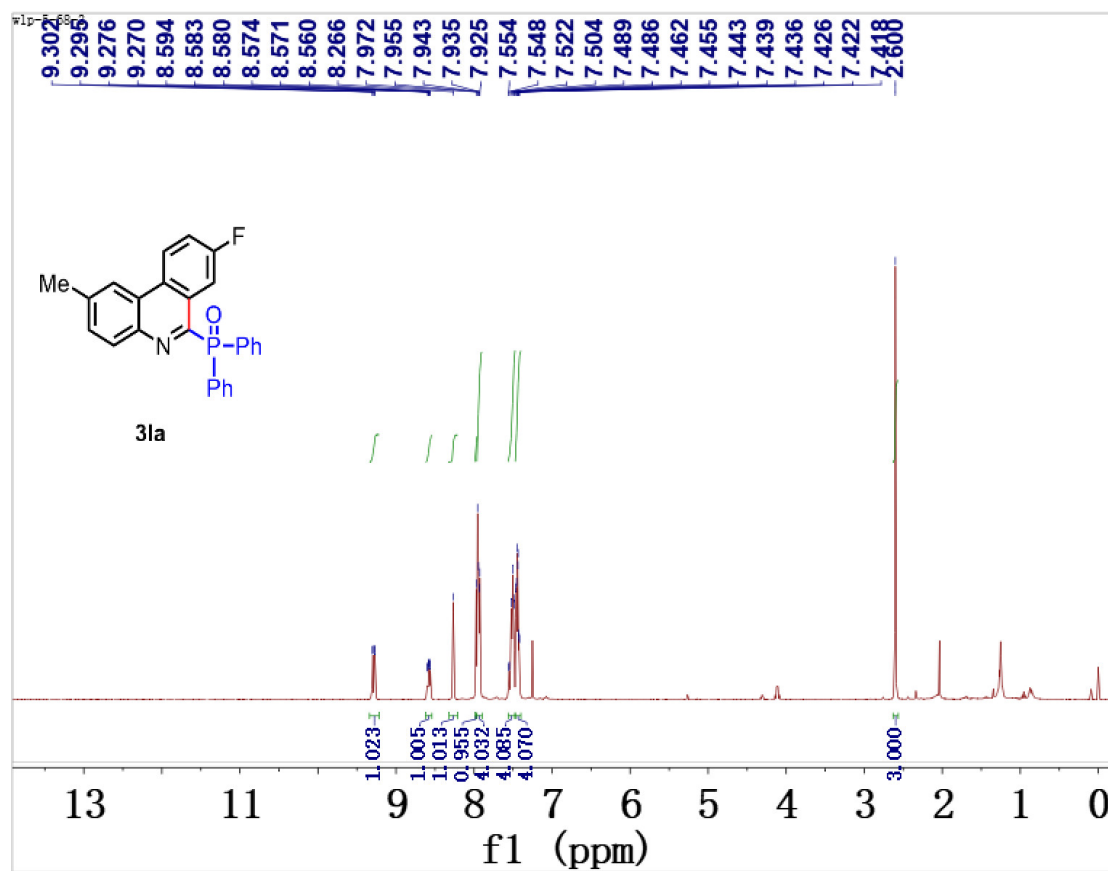

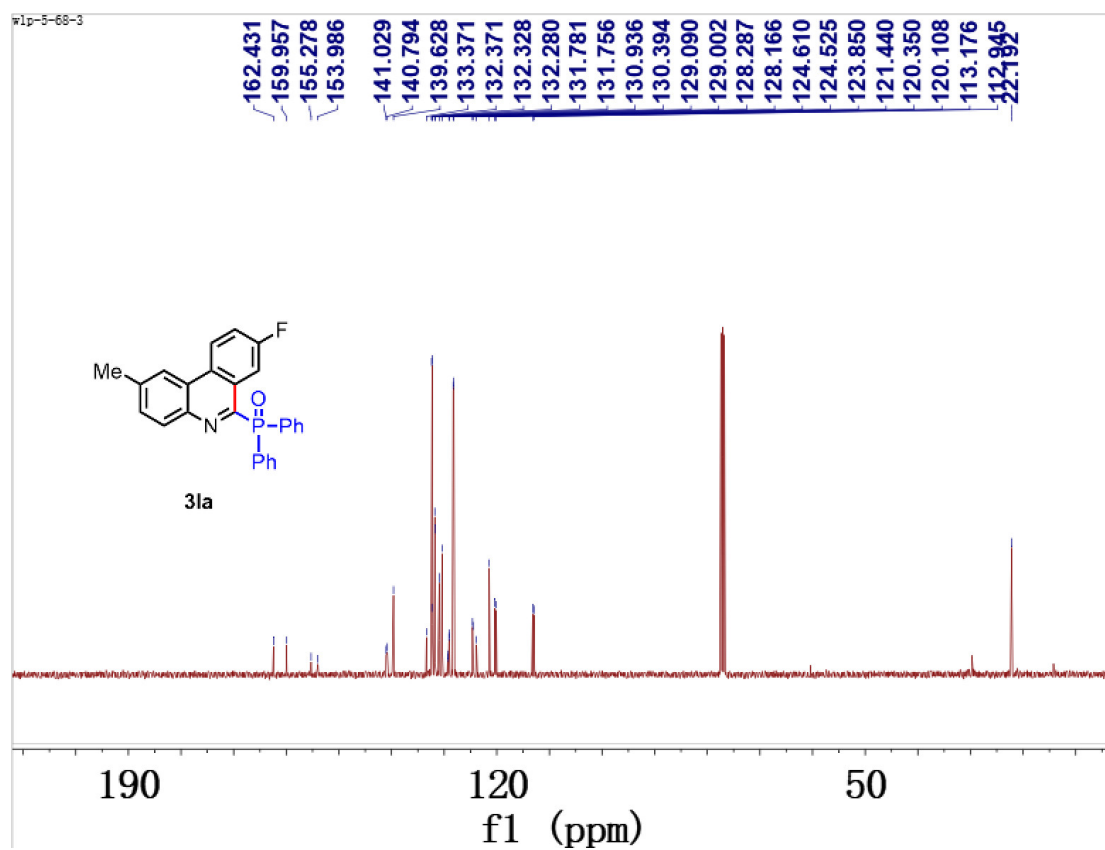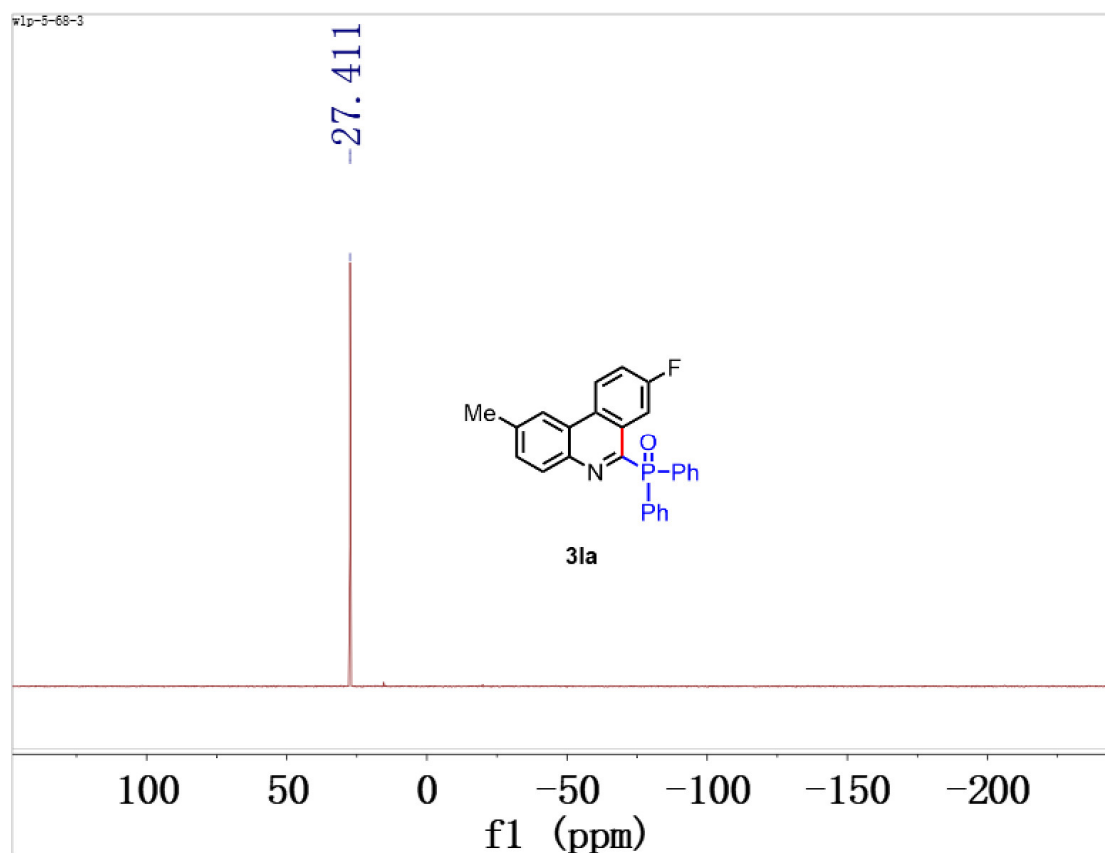



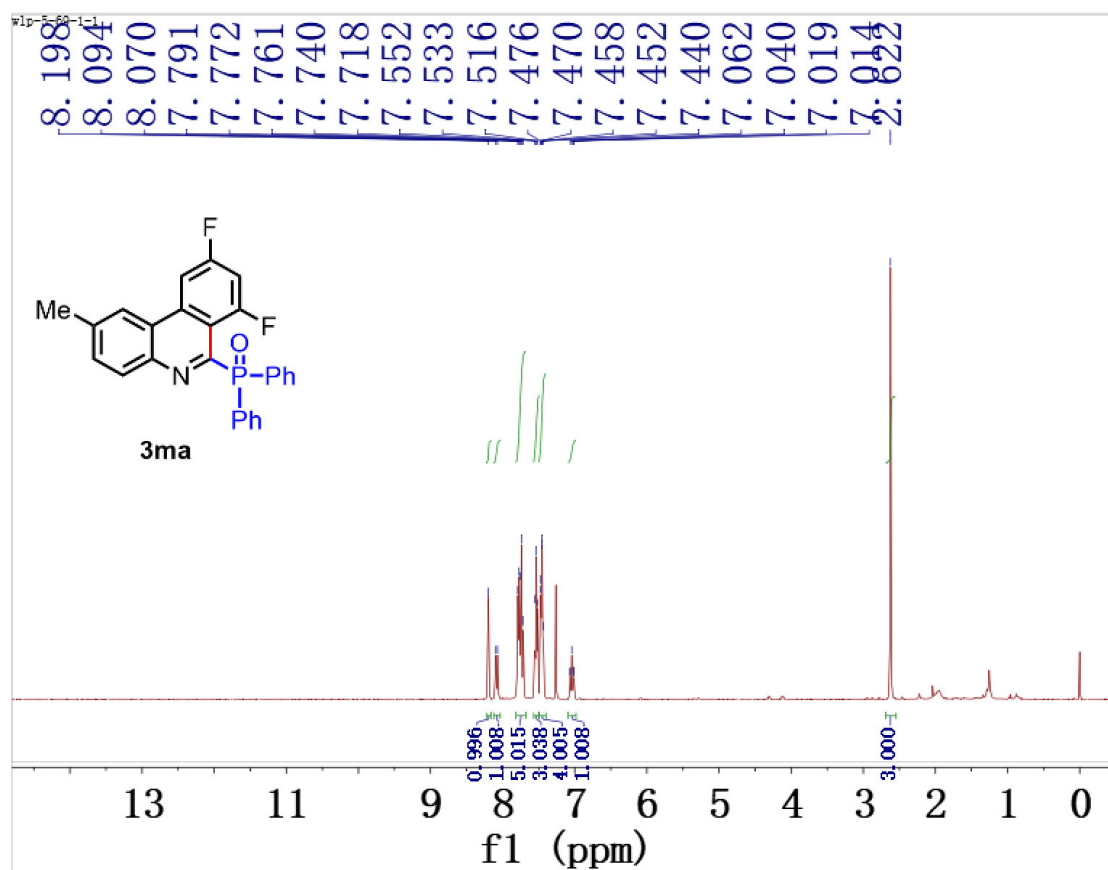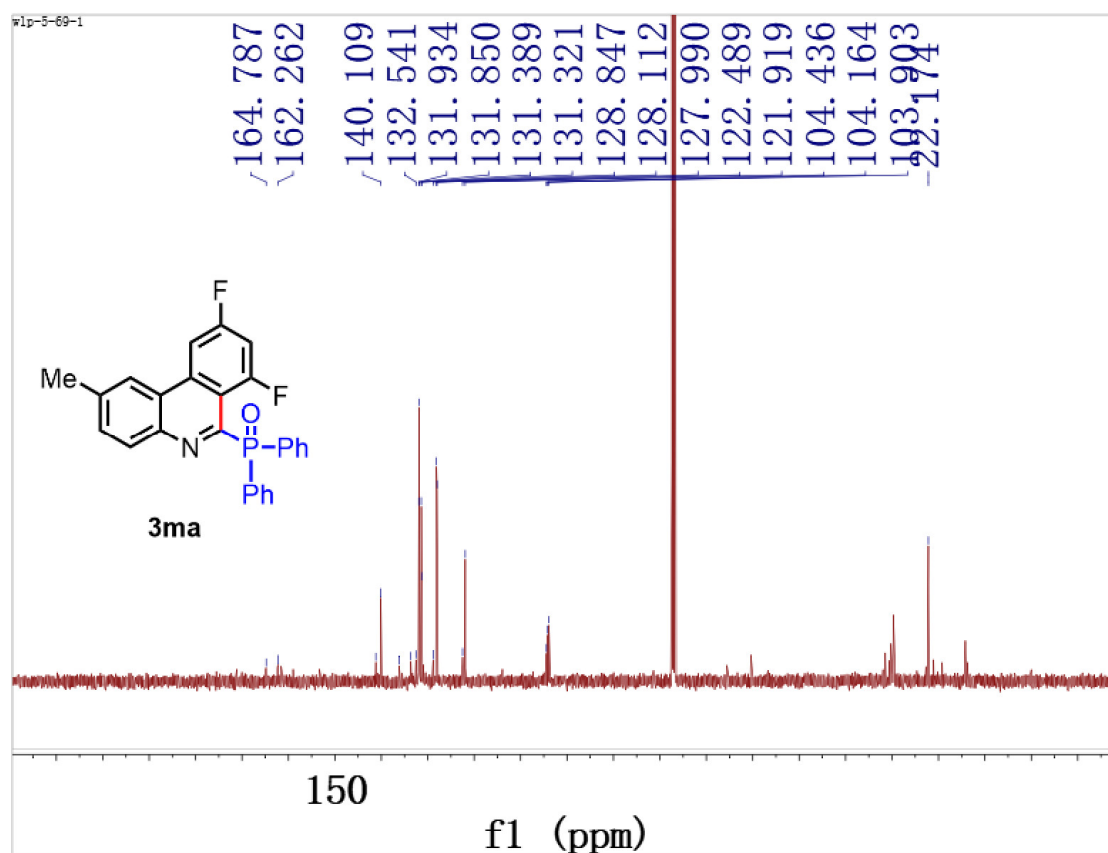

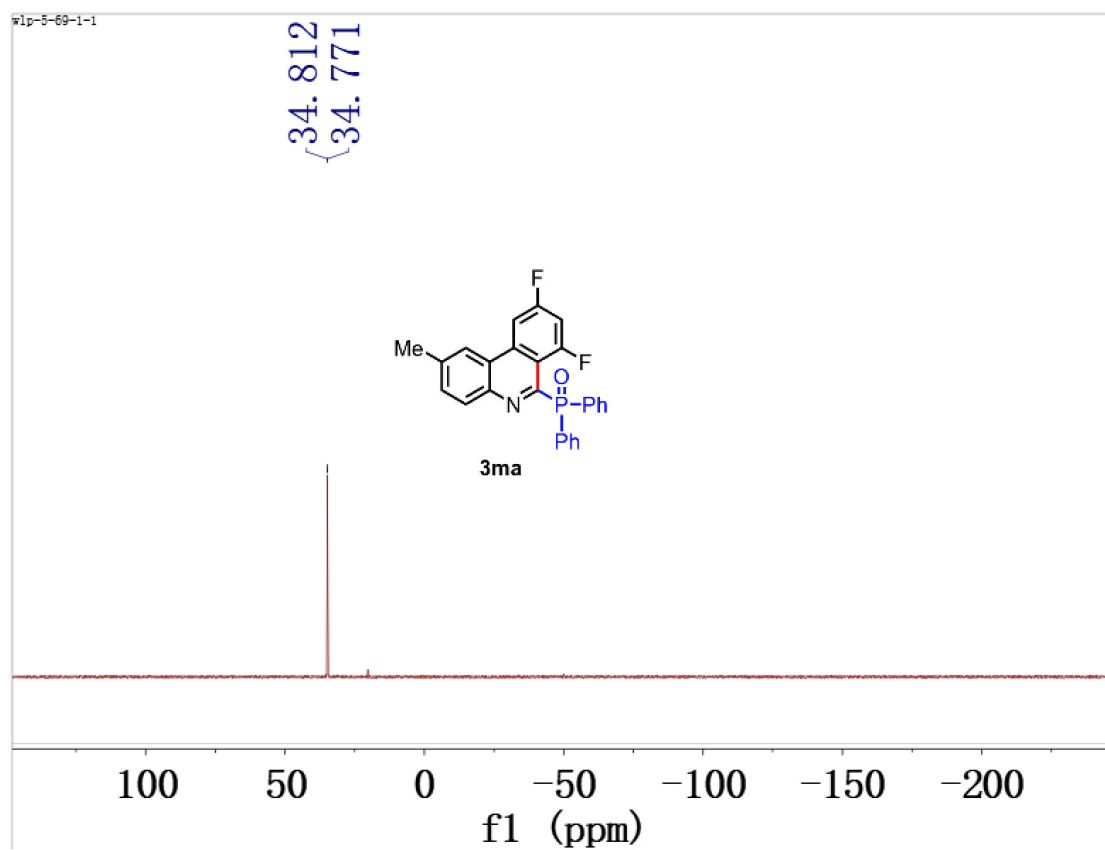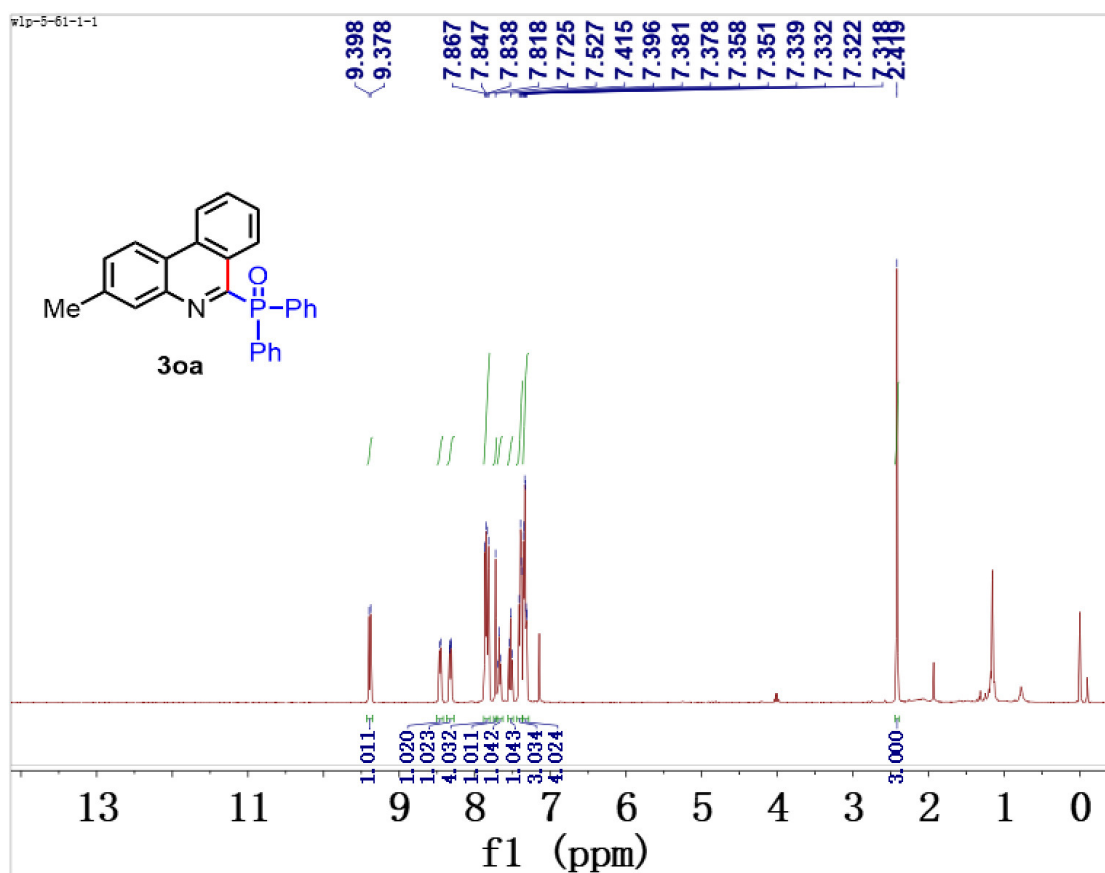

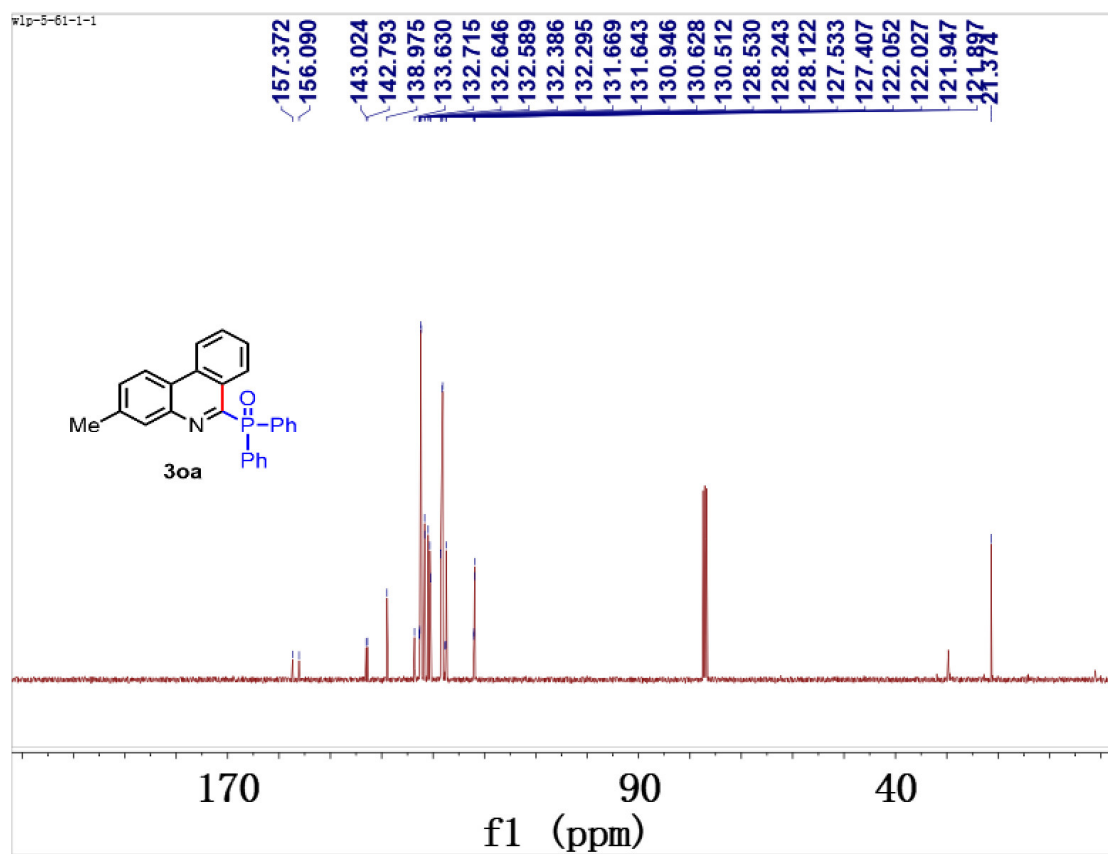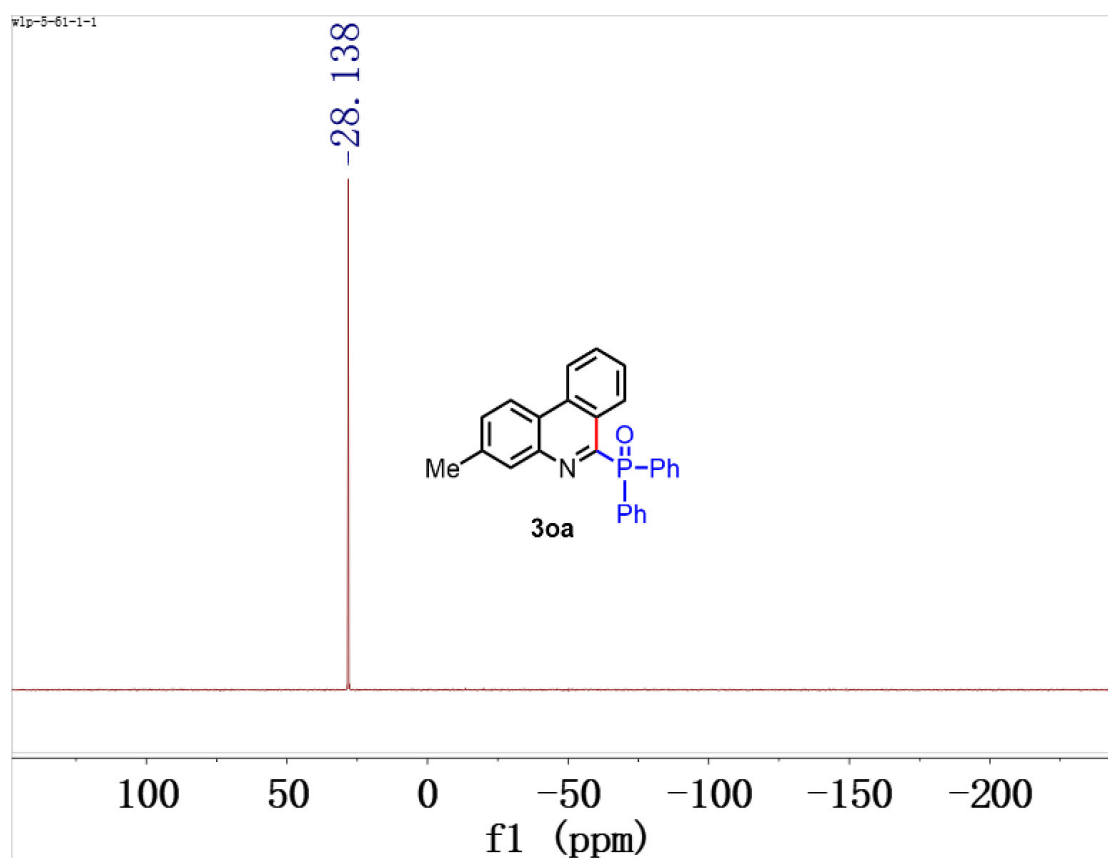

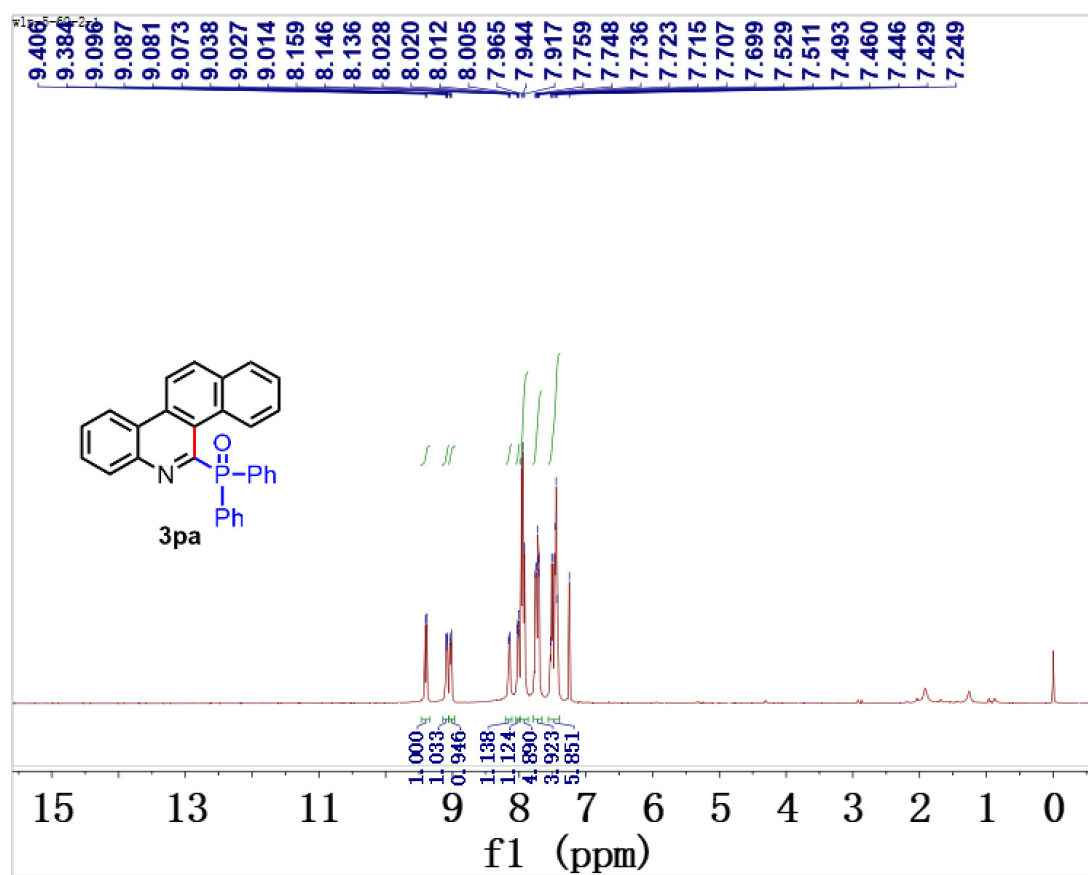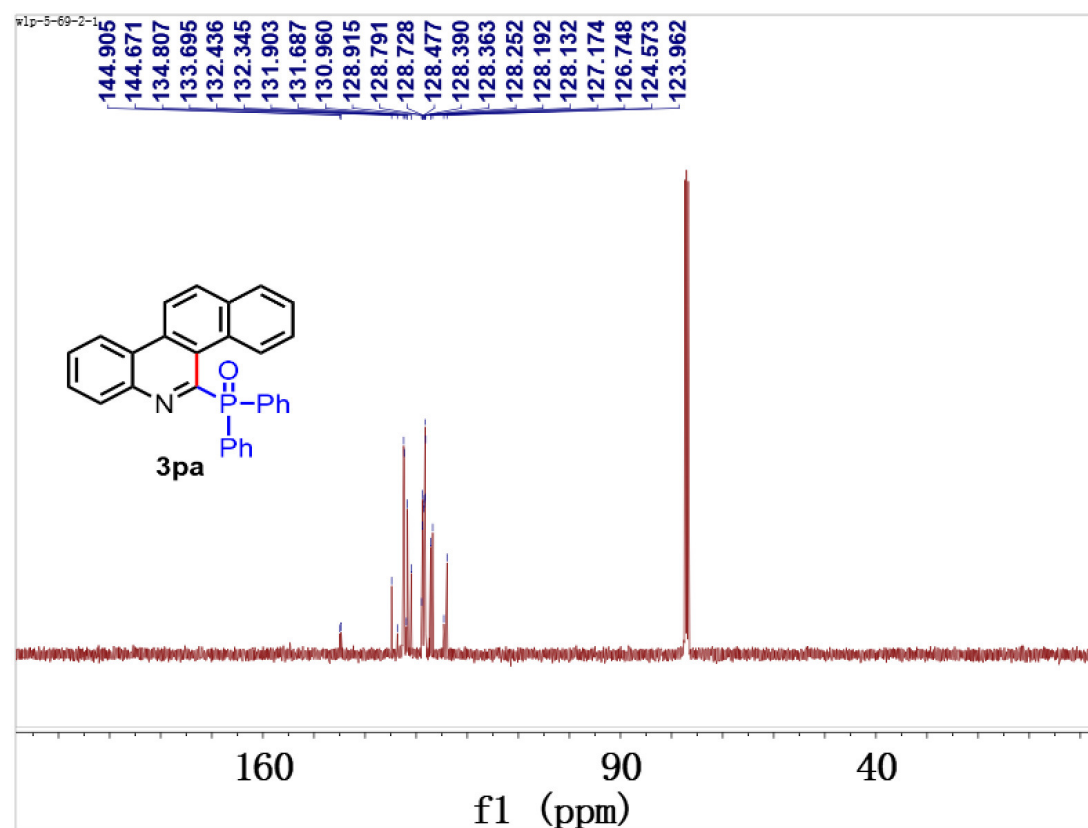

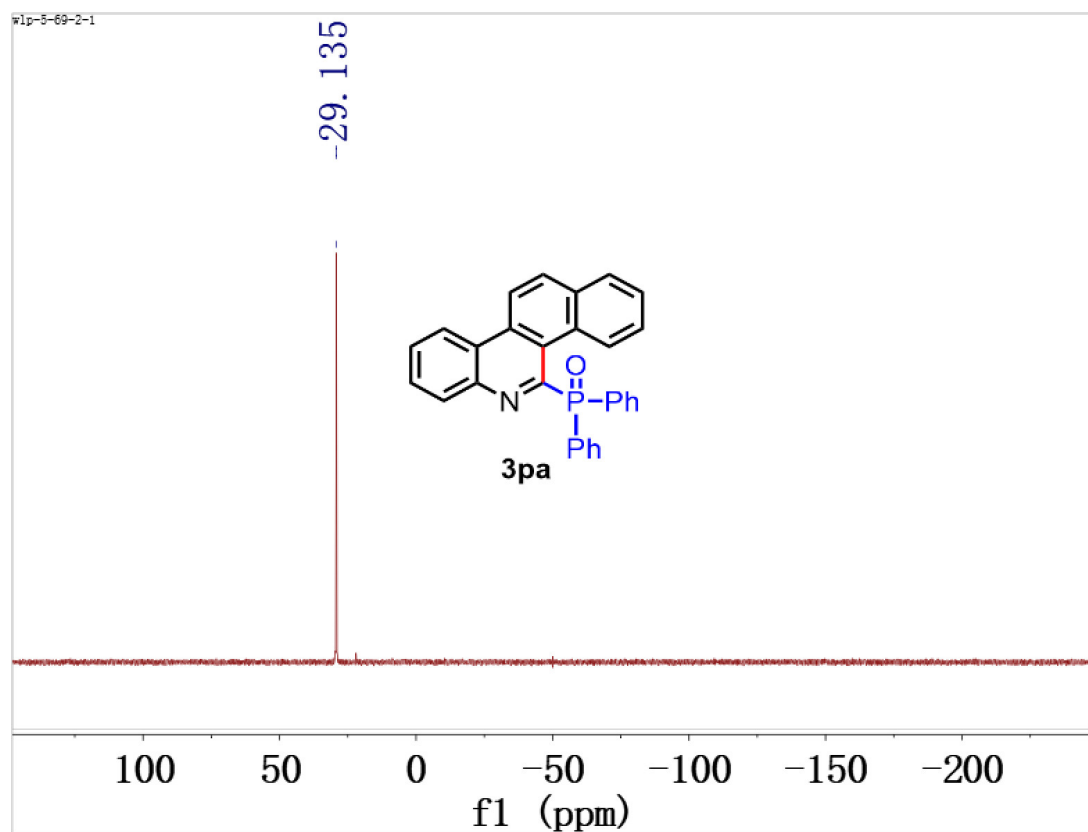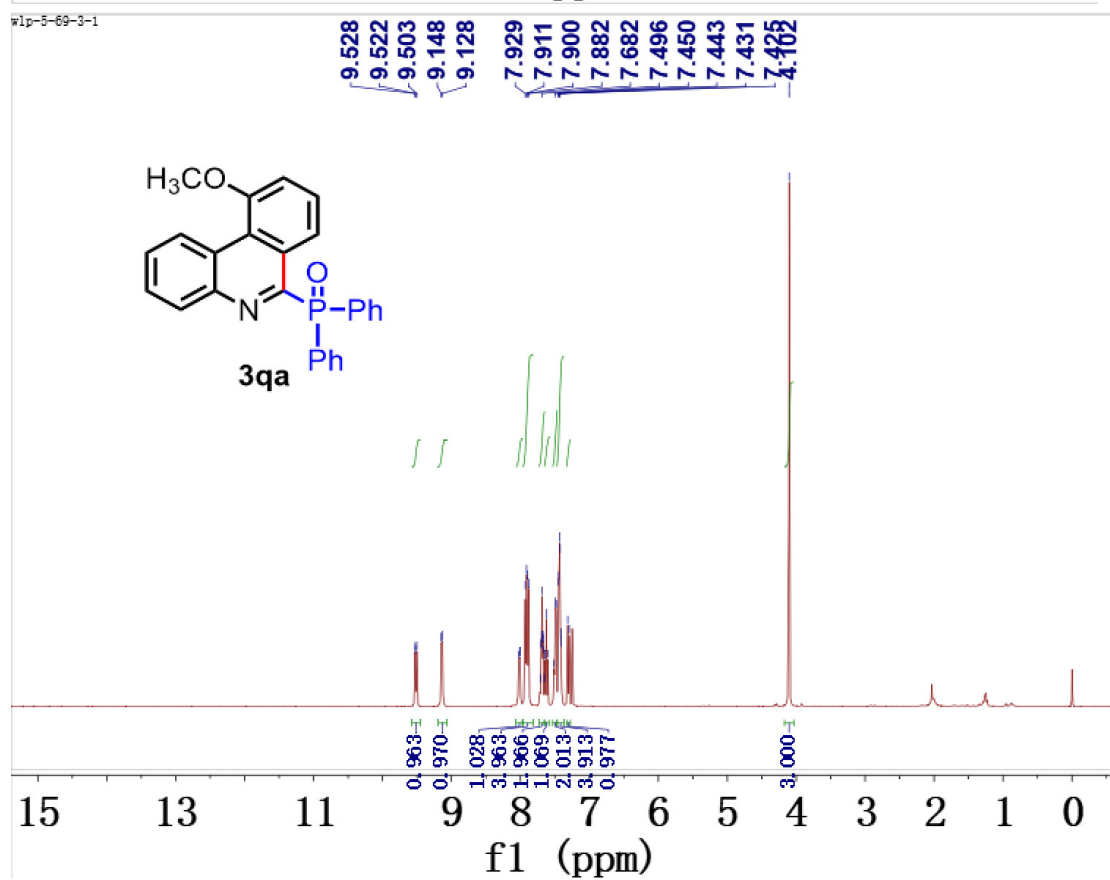

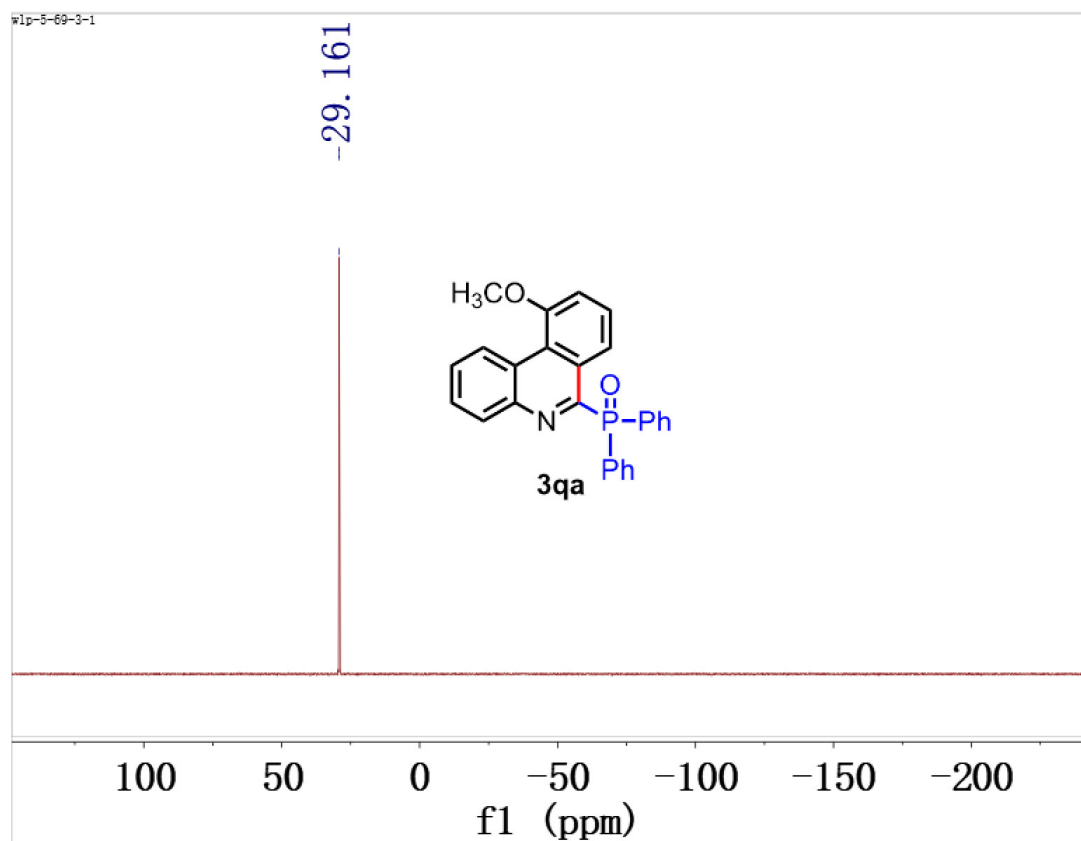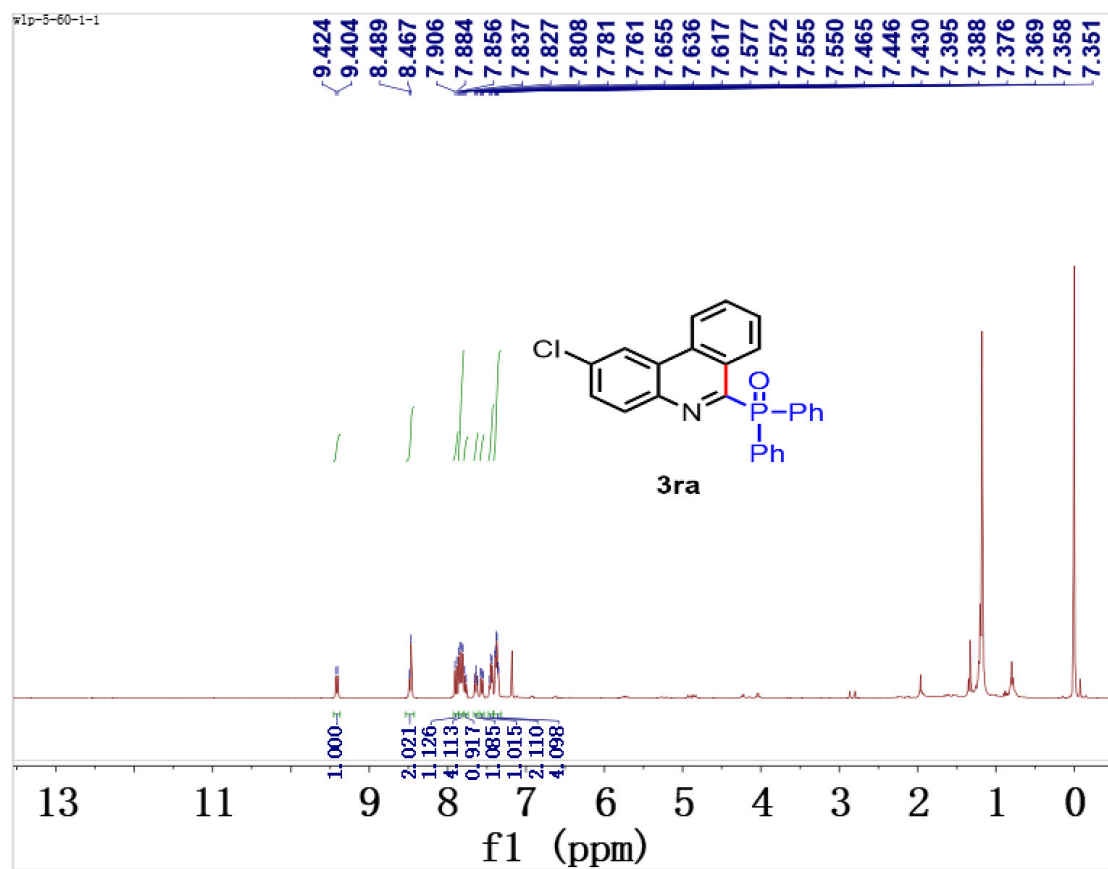

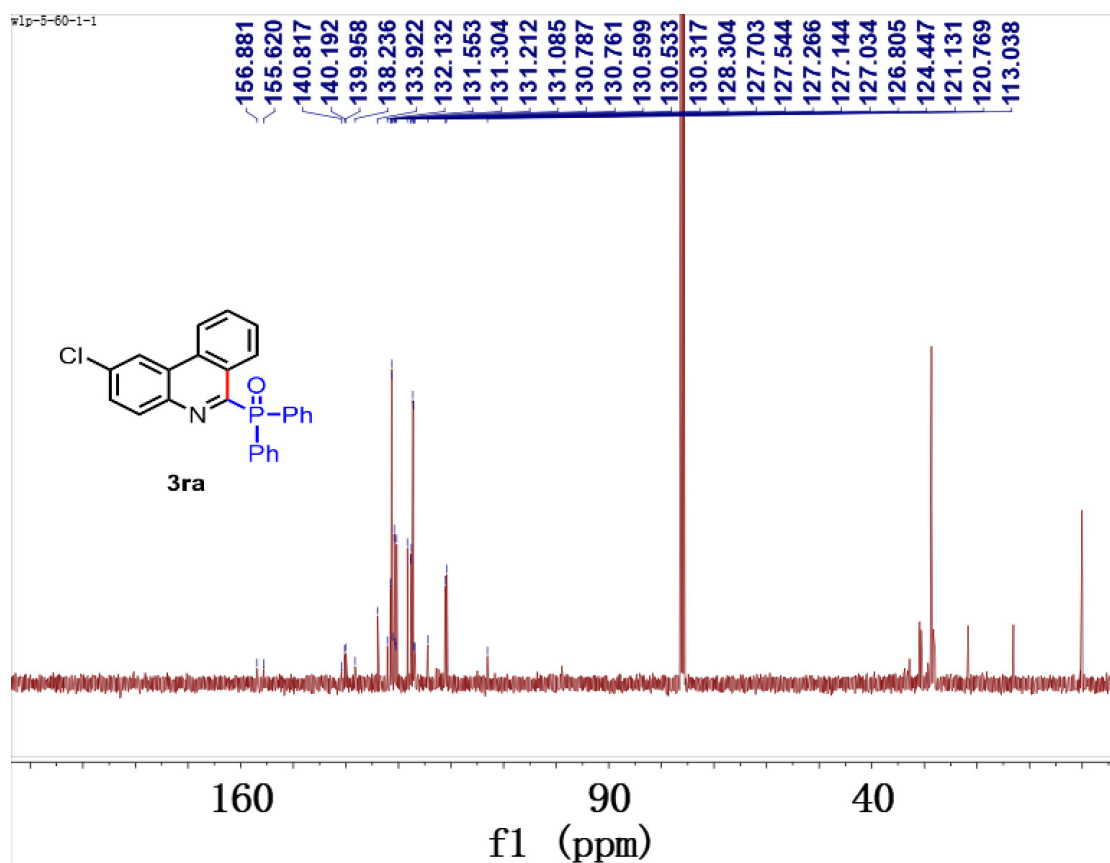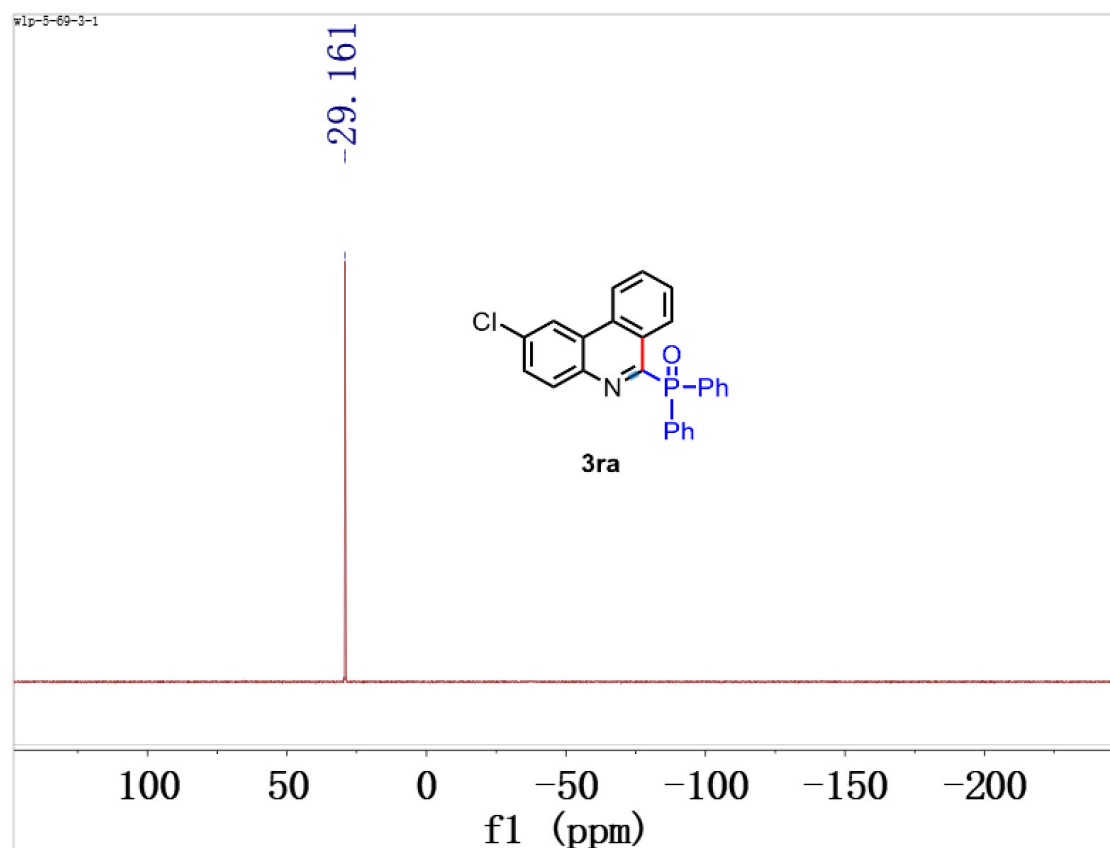

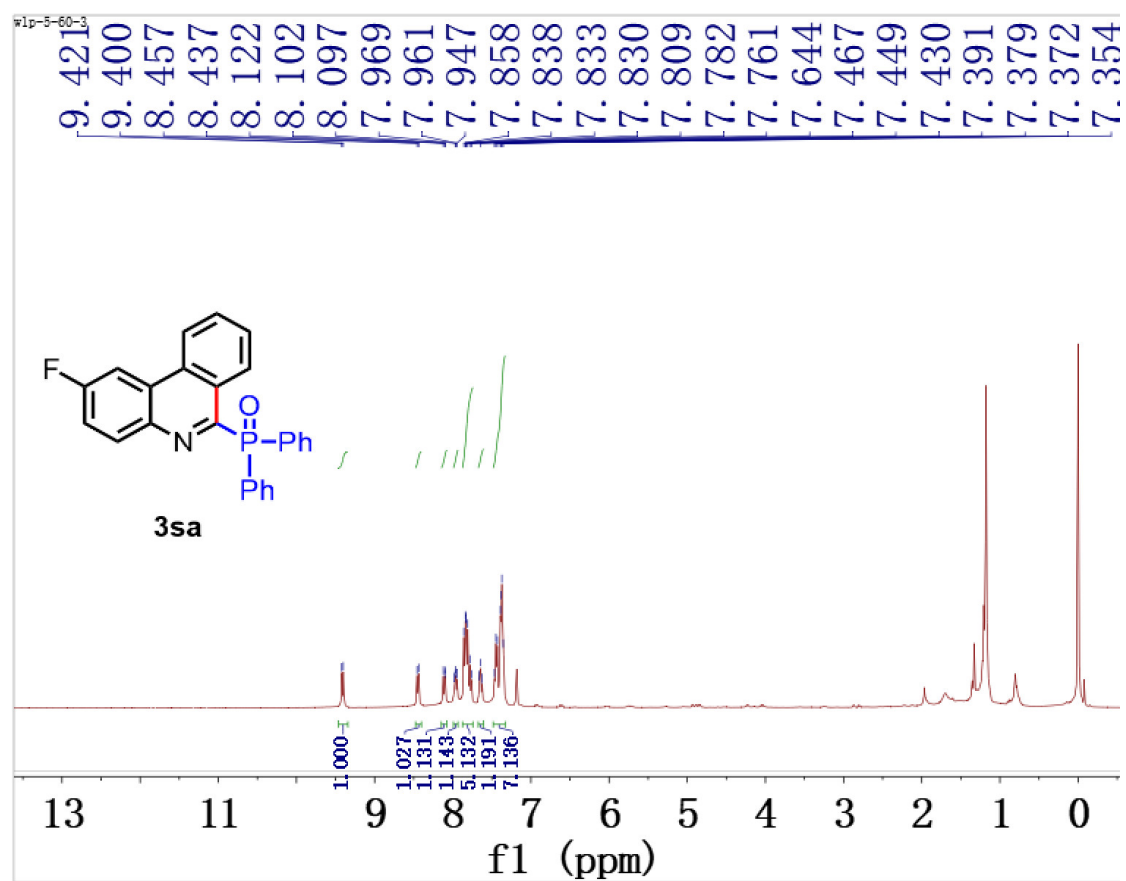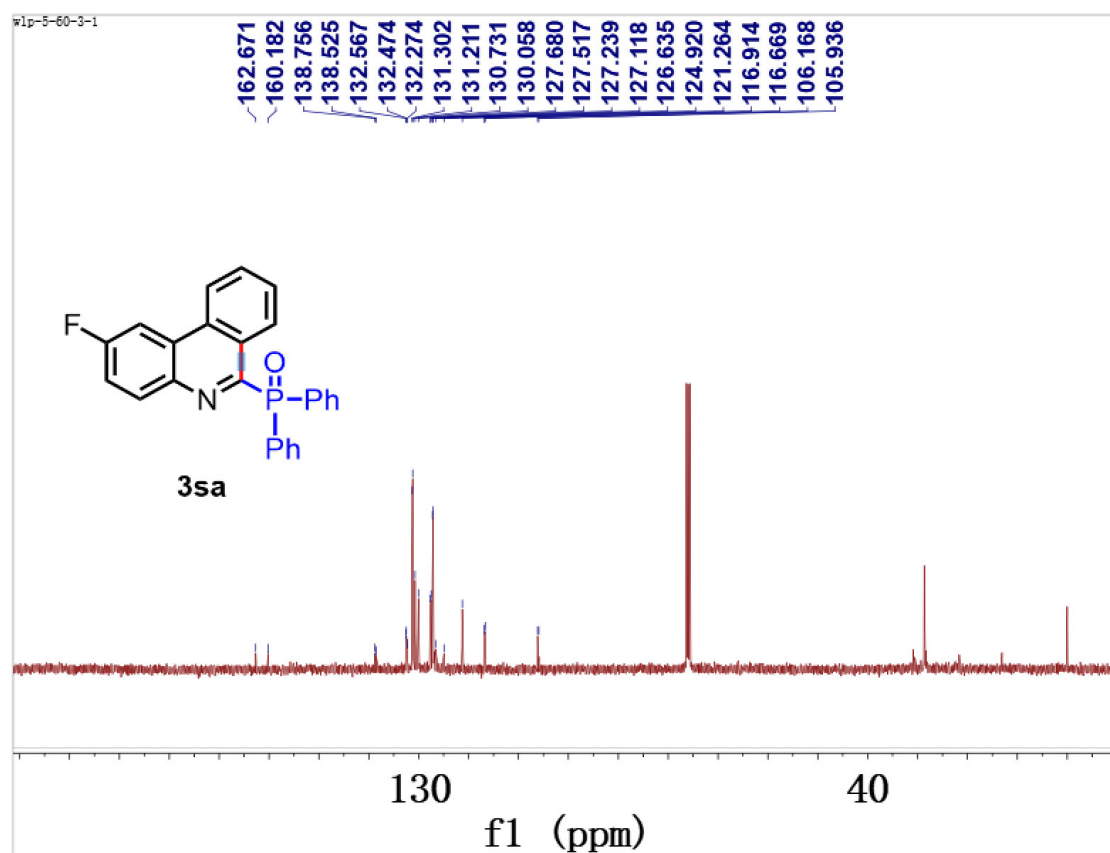



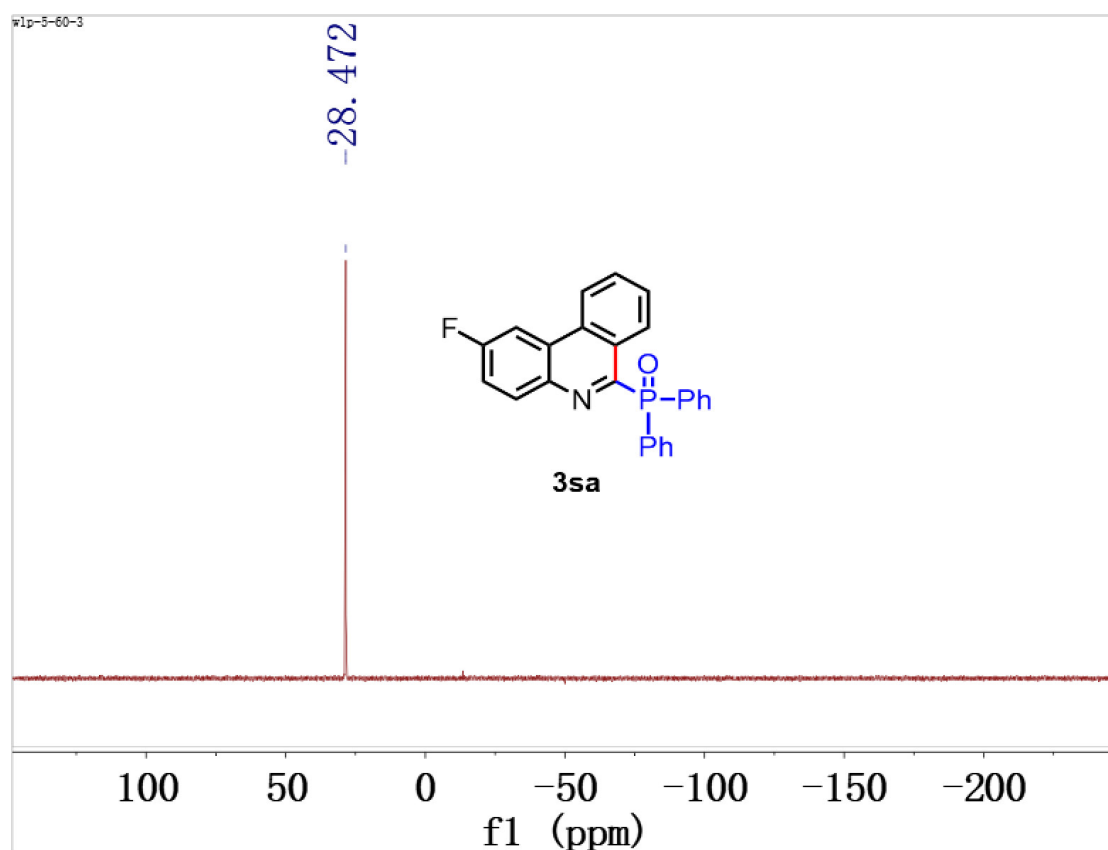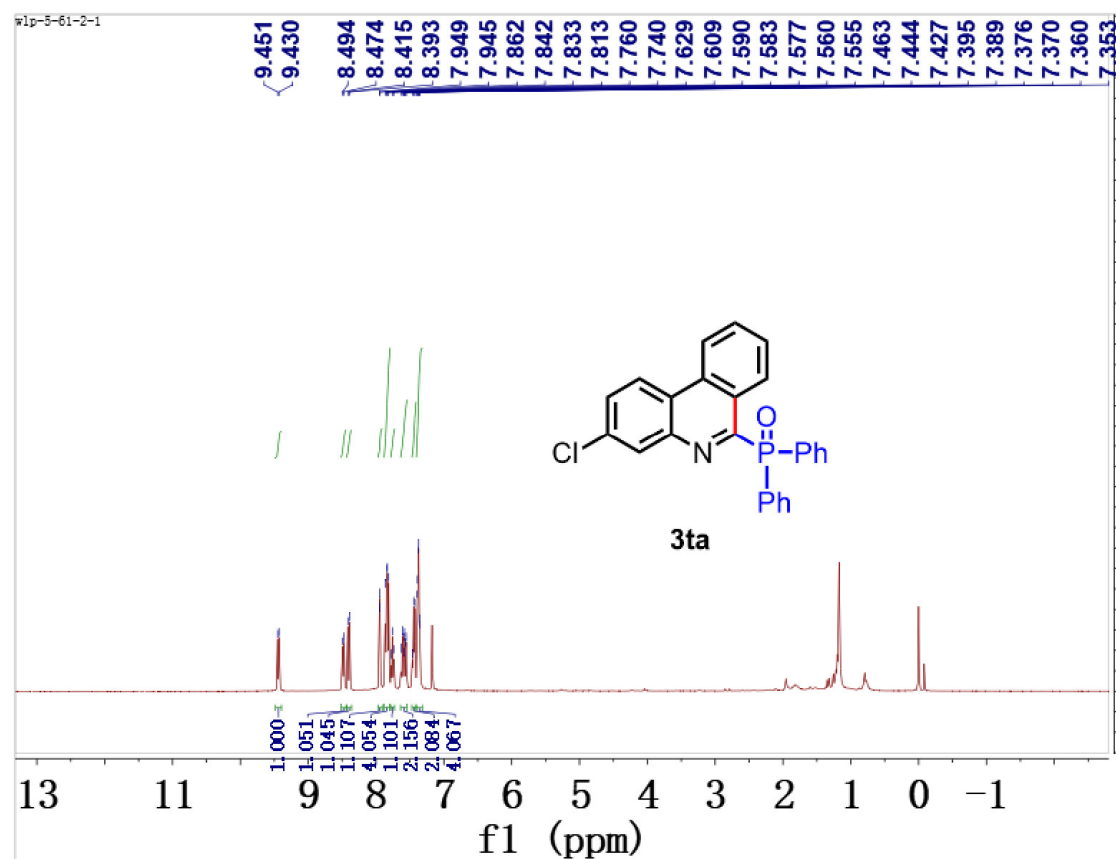

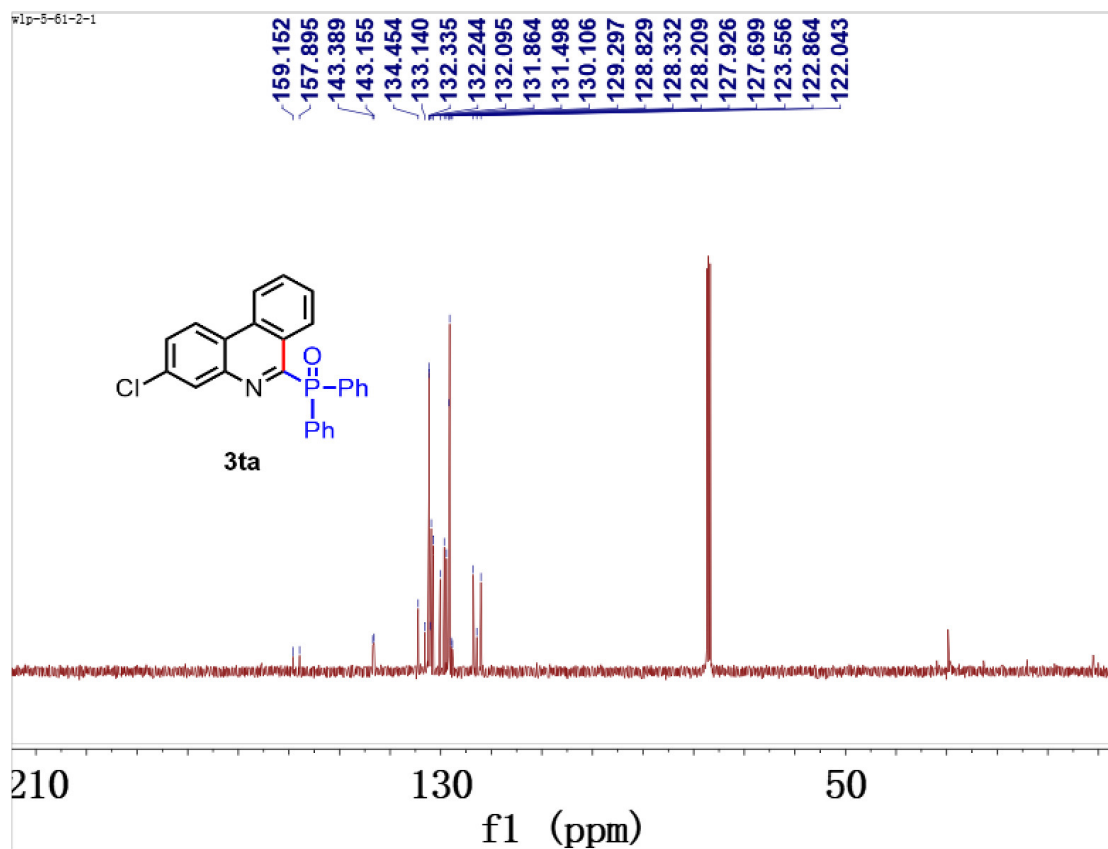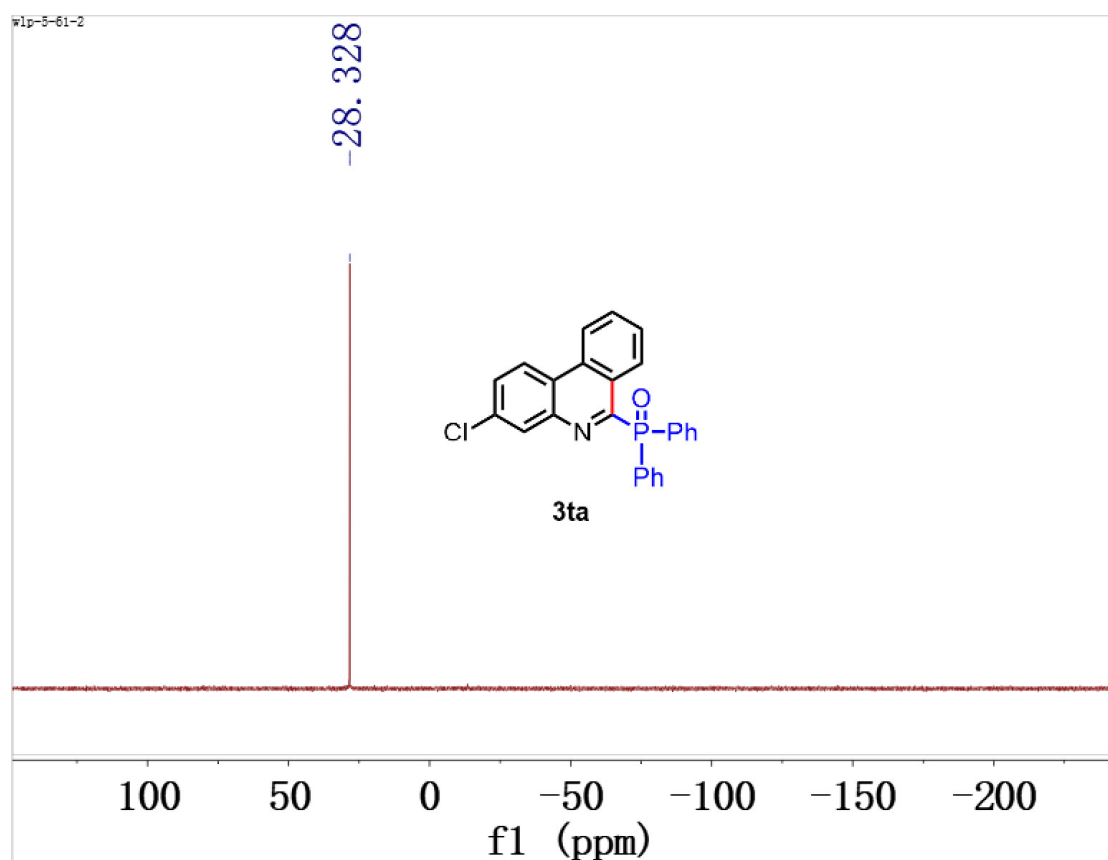

Supplement: s1 [file s1]
